# Supplementary material
Source: publisher site journal article supplement (https://www.dovepress.com/get_supplementary_file.php?f=335475.docx)
Supplement: Supplementary file 1 [file get_supplementary_file.php]

**
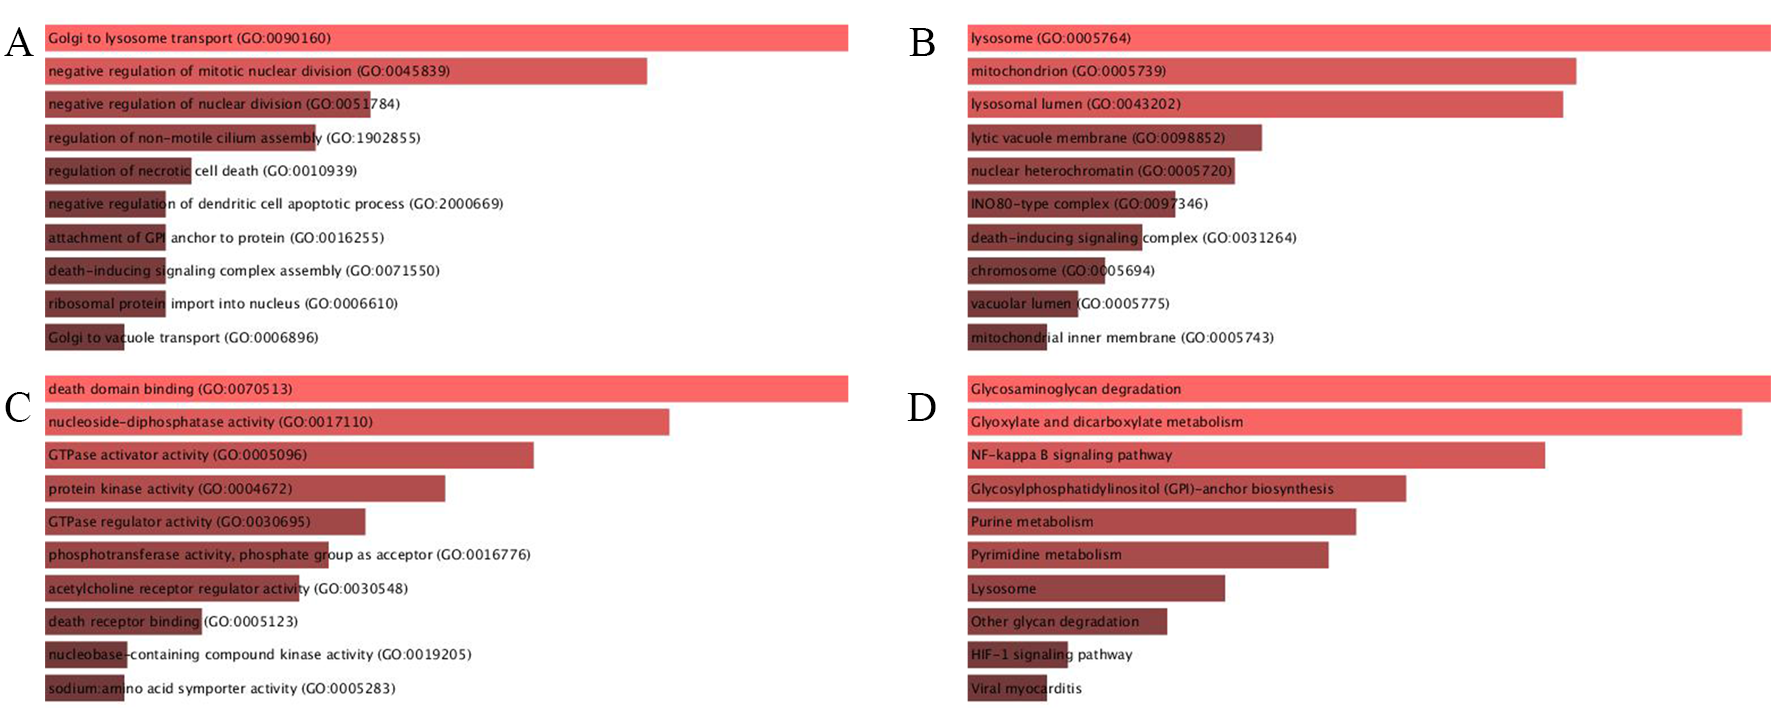
Figure S1** Biological analysis of AS-events genes. (A) GO analysis for Biological Process (B) GO analysis for cellular component (C) GO analysis for molecular function (D) KEGG analysis

**
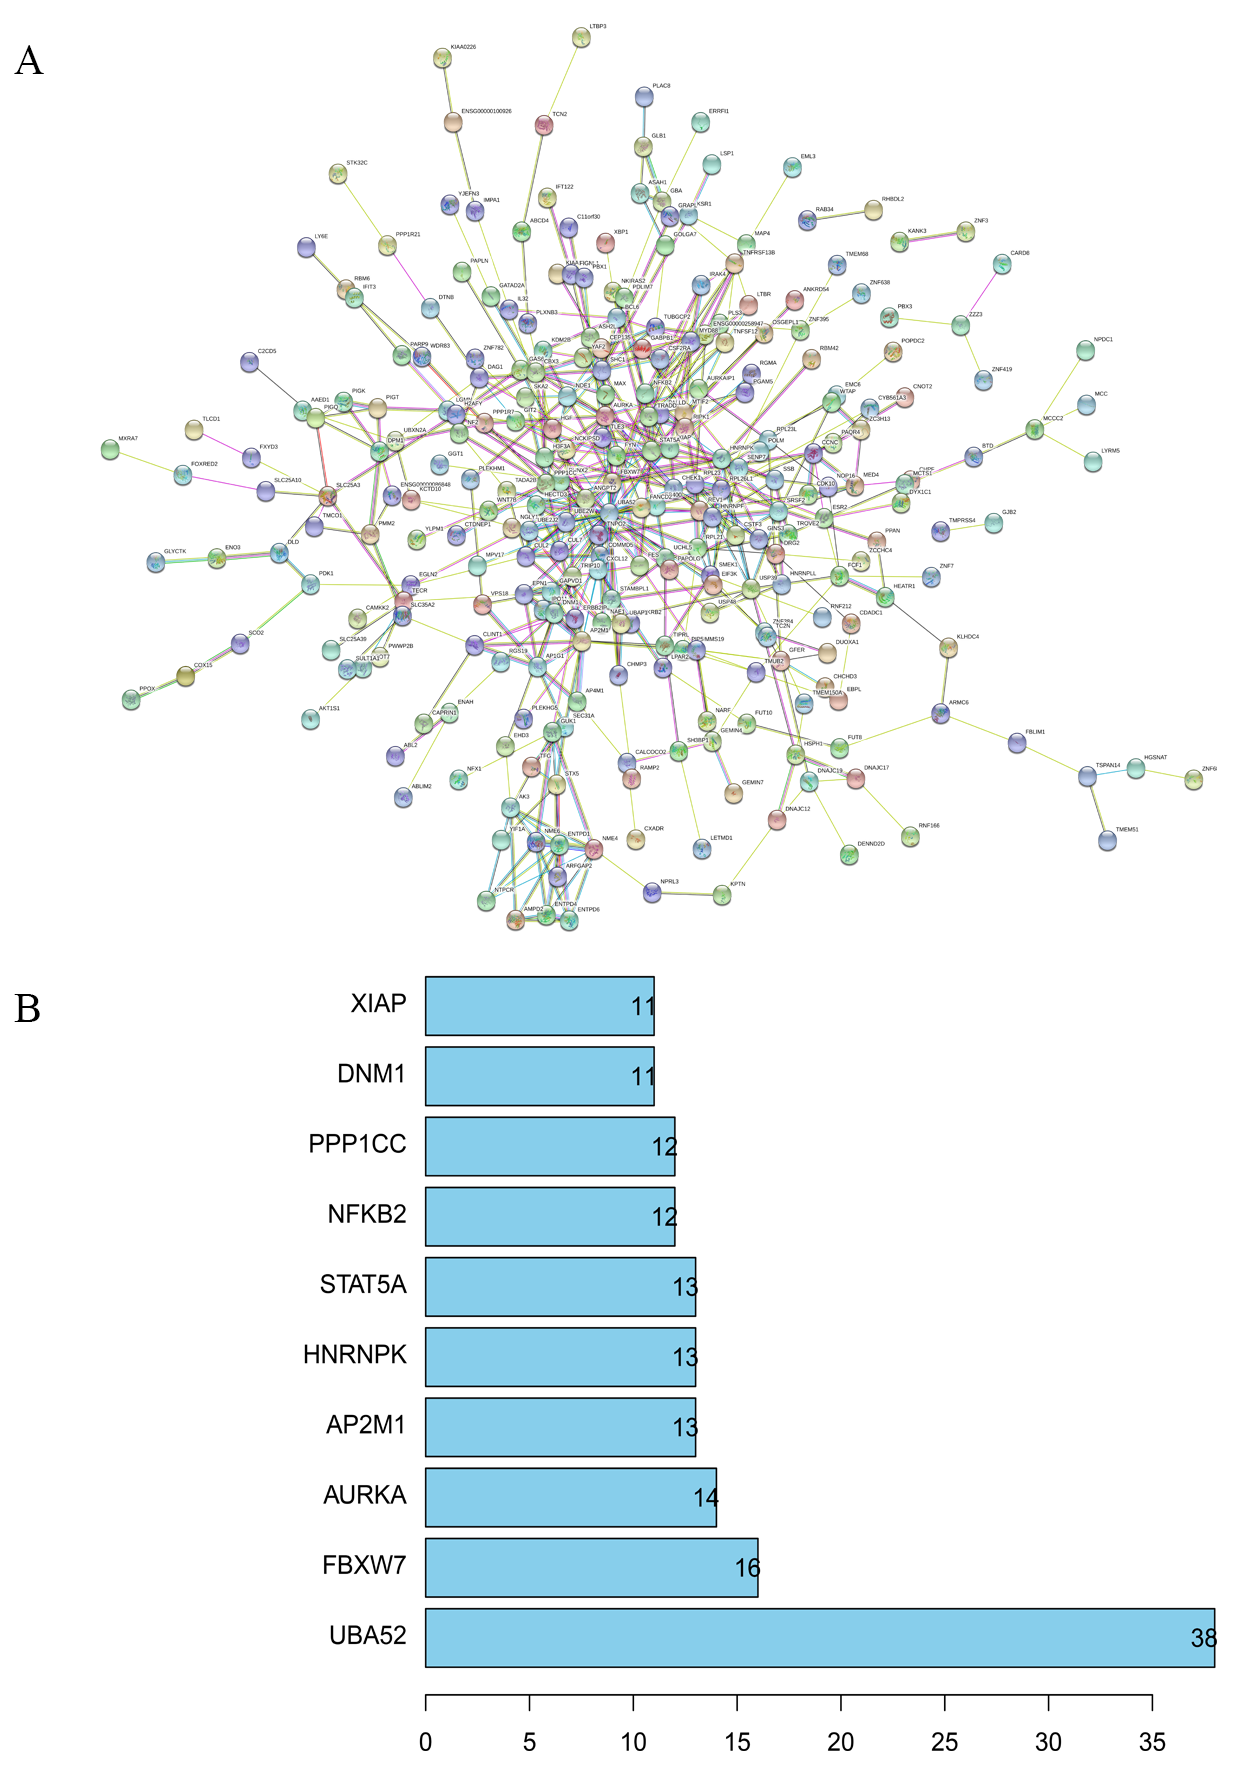
Figure S2** PPI network for AS-events genes. (A) 3355 genes were filtered into the DEGs PPI network complex that contained 380 nodes and 506 edges. (B) Histogram of key proteins. The y-axis represents the name of genes, the x-axis represent the number of adjacent genes, and height is the number of gene connections.

**
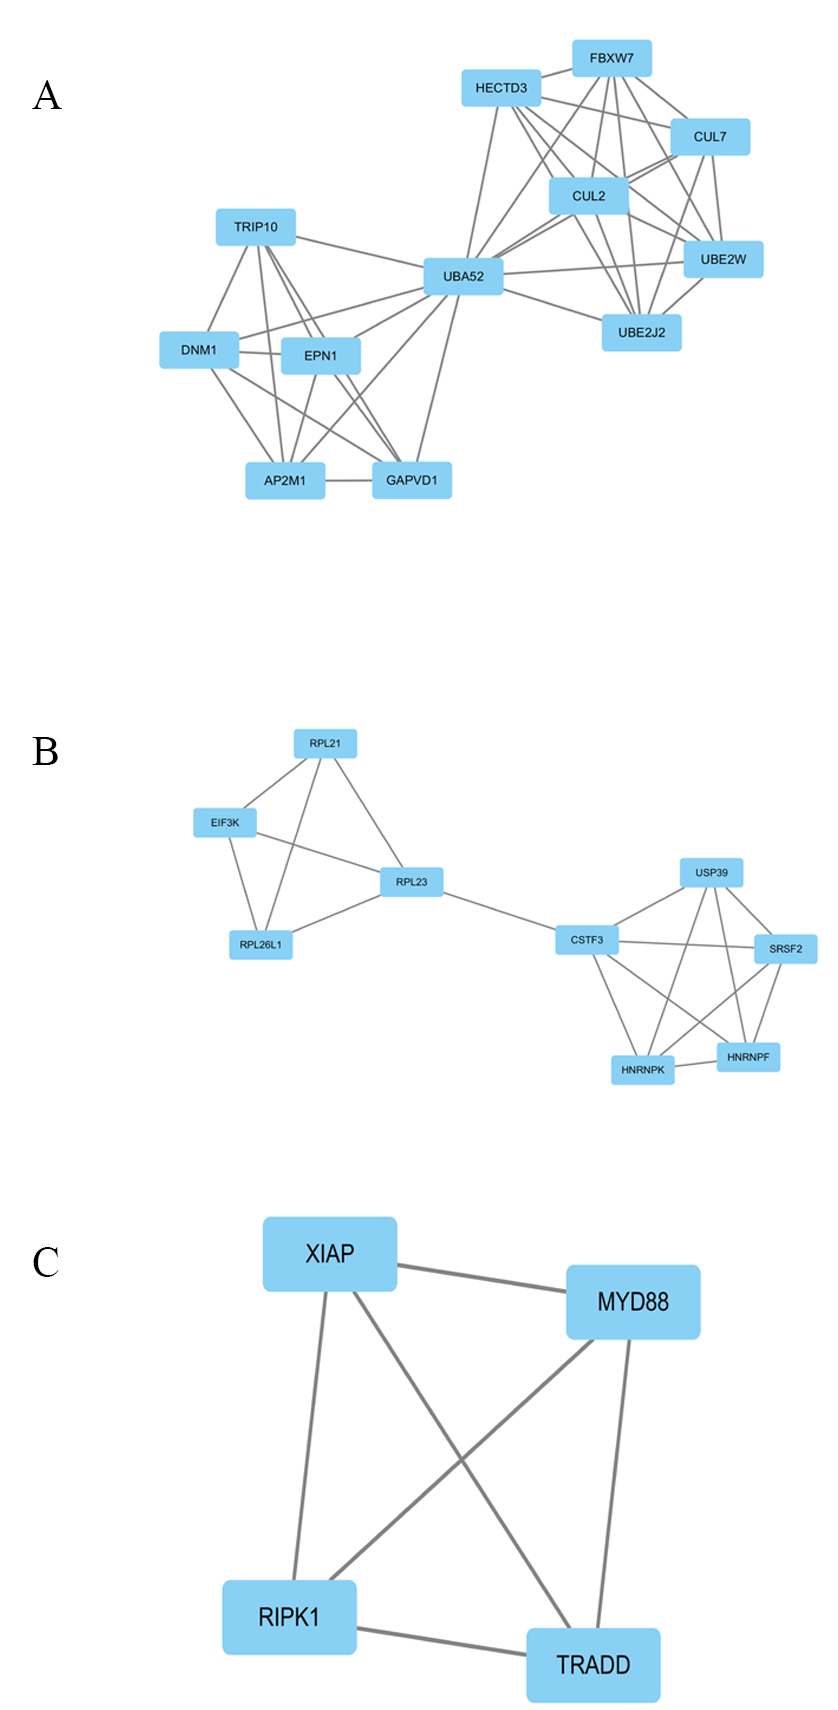
**

**Figure S3** Module analysis of PPI network. (A) Module rank 1. This cluster consists of 12 nodes and 36 edges and has the highest score. (B) Module rank 2. This cluster consists of 9 nodes and 17 edges and has the second highest score. (C) Module rank 3. This cluster consists of 4 nodes and 6 edges and has the third highest score.


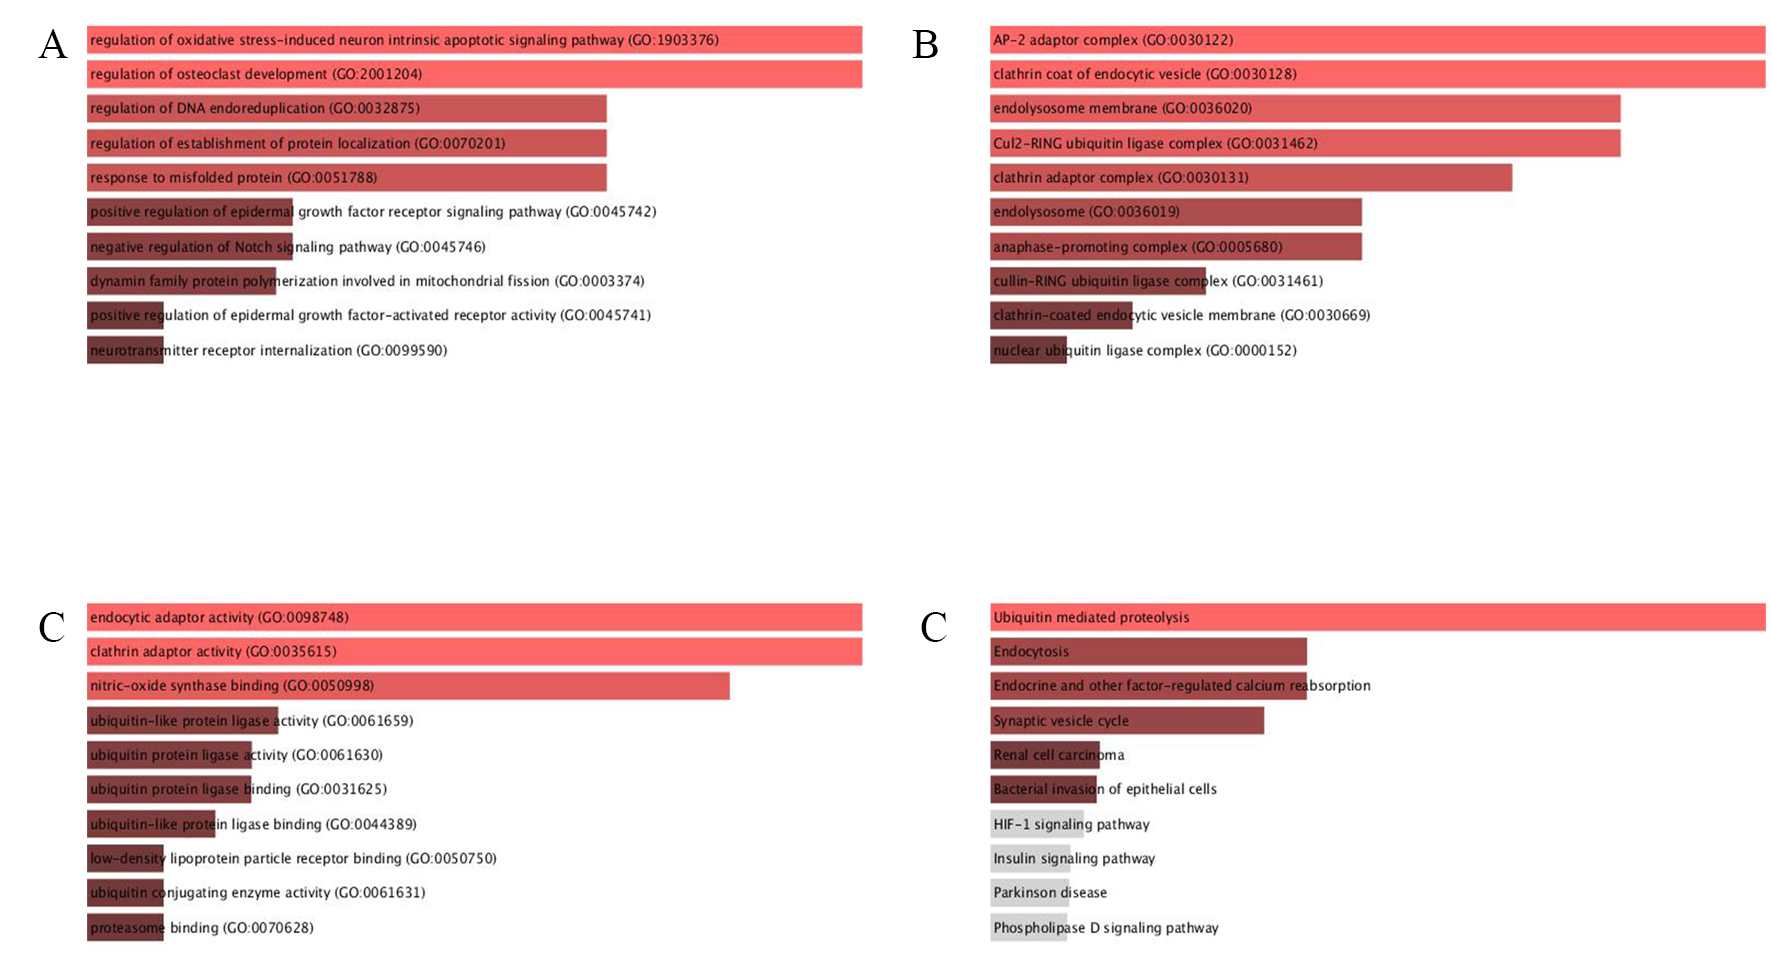


**Figure S4** GO and KEGG analyses on the hub module. (A) GO analysis for Biological Process (B) GO analysis for cellular component (C) GO analysis for molecular function (D) KEGG analysis


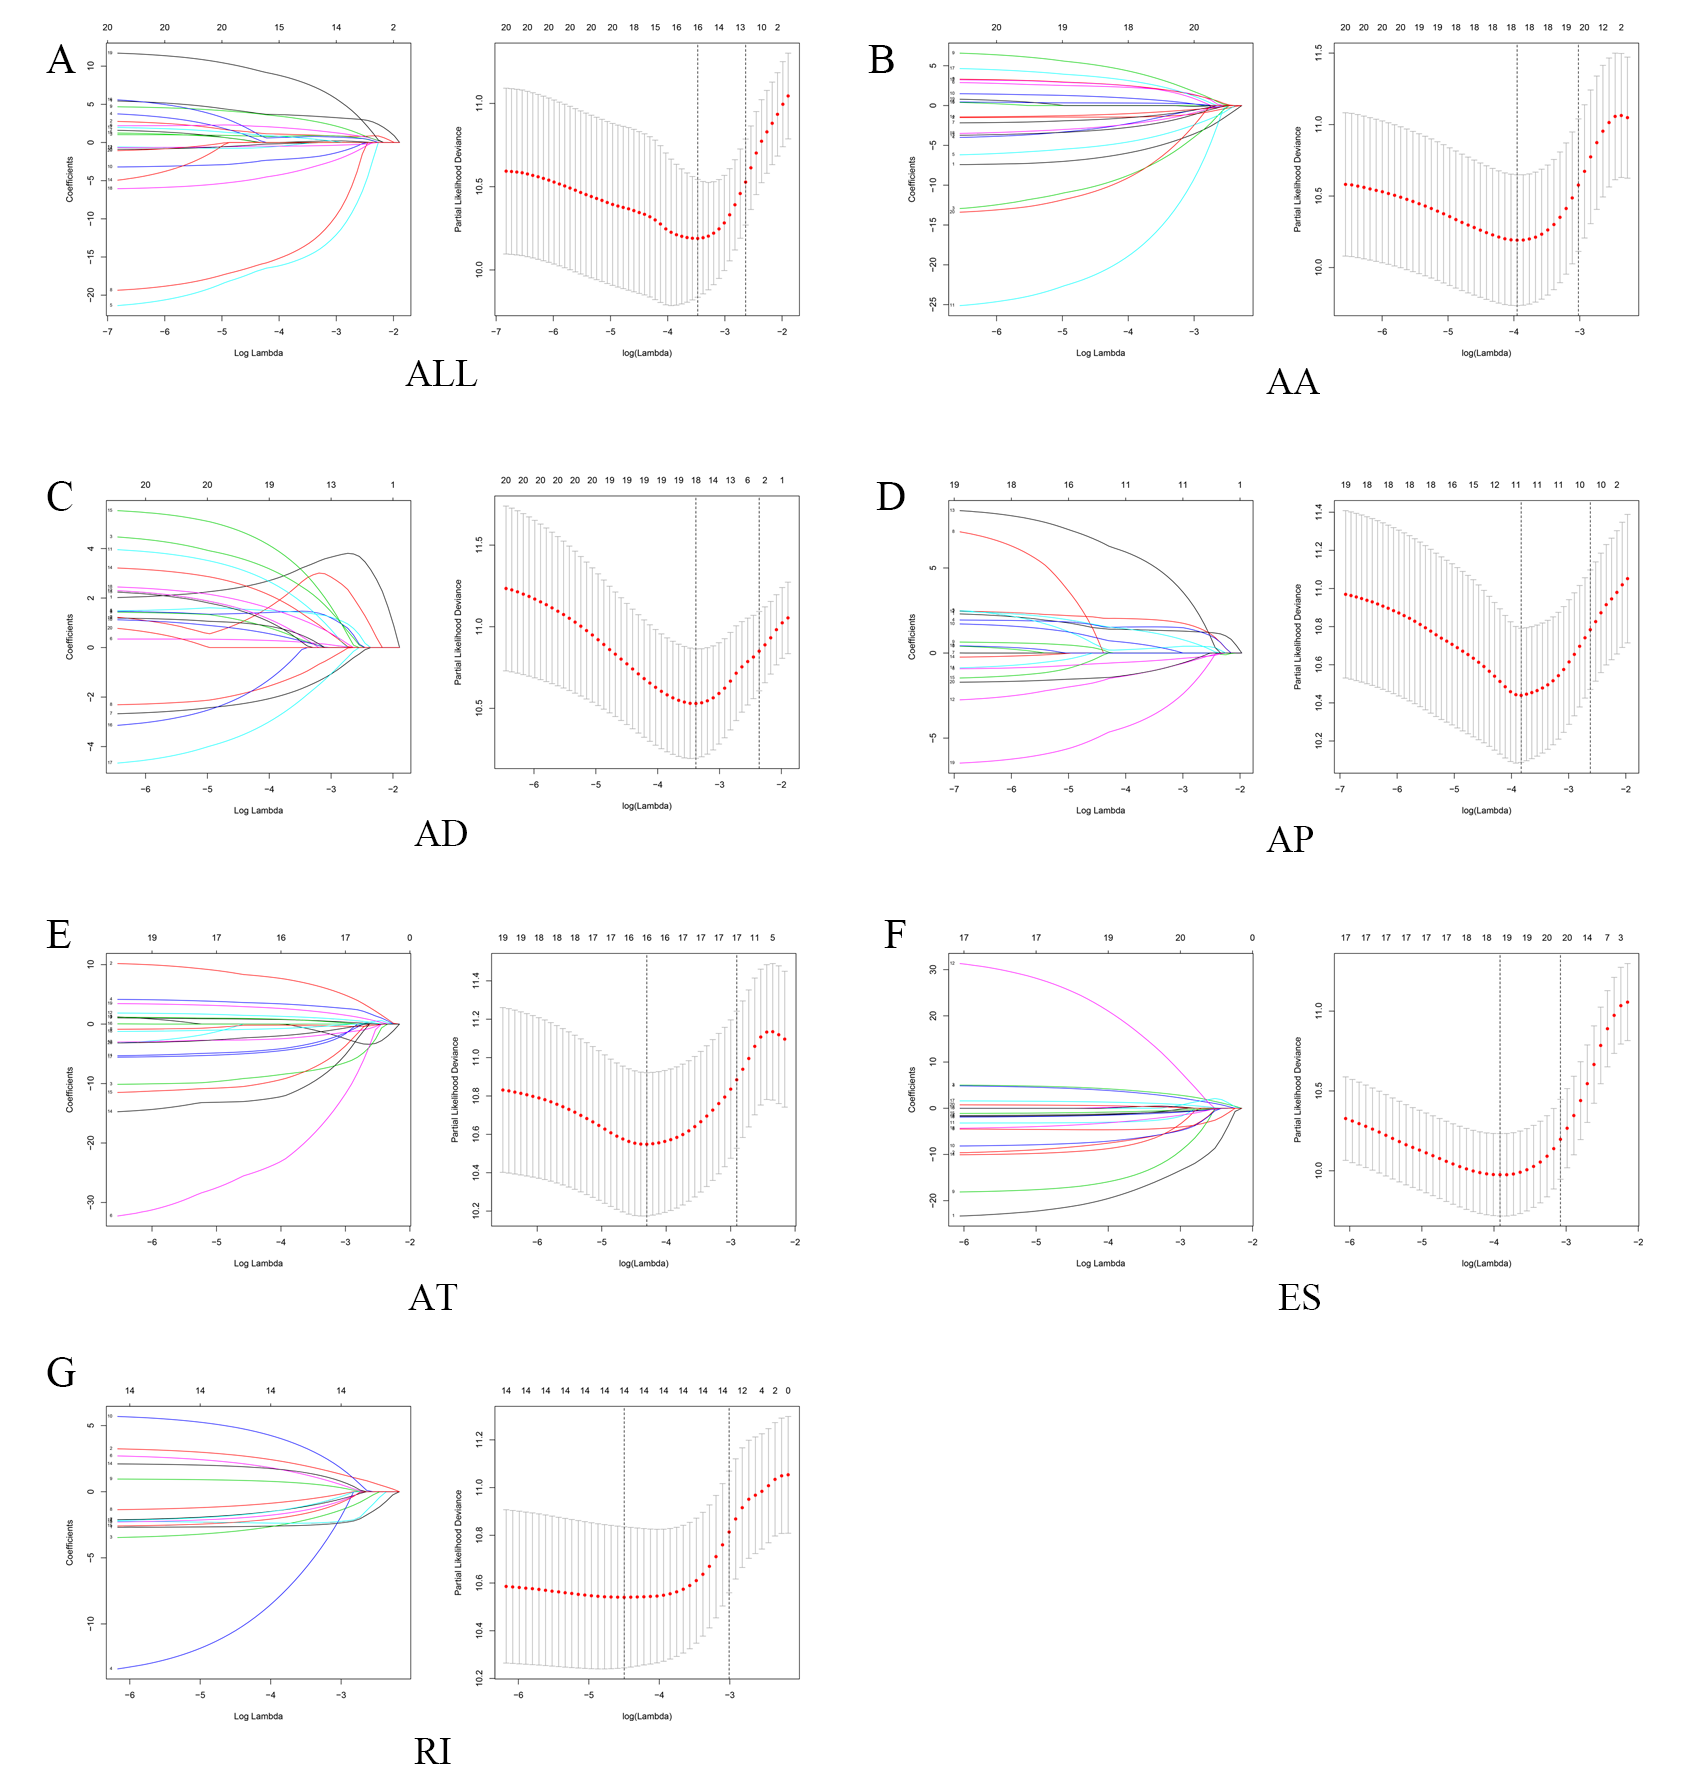


**Figure S5** Construction of prognostic signatures based on LASSO COX analysis target 7 types of AS-event genes. (A) ALL (B) AA (C) AD (D) AP (E) AT (F) ES (G) RI.

**
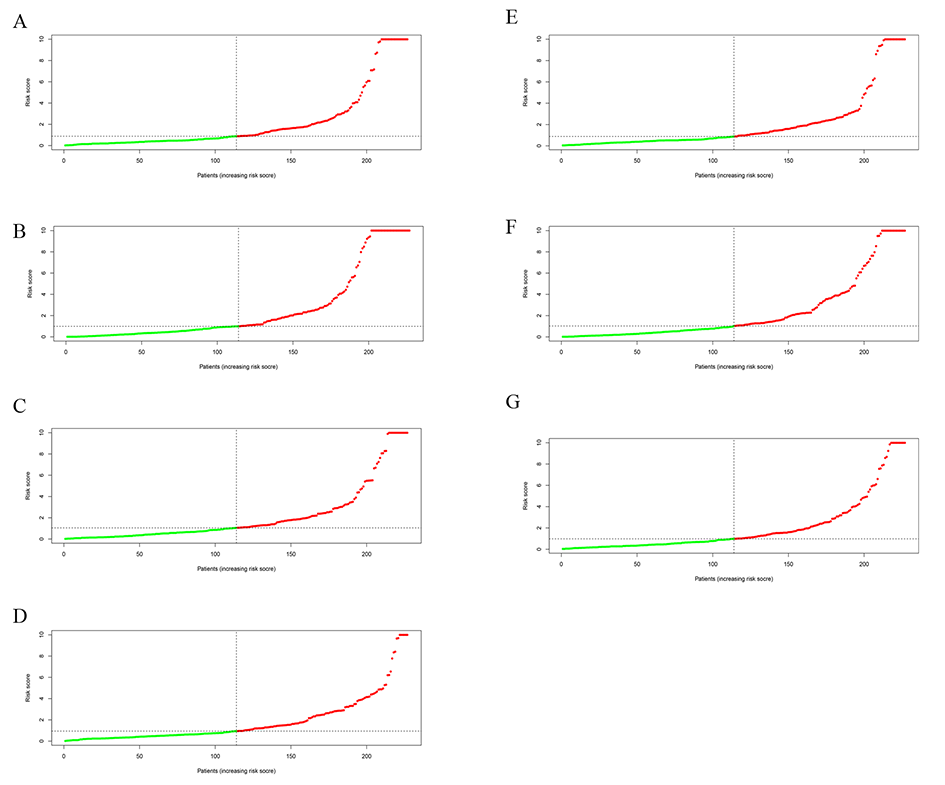
**

**Figure S6** Seven types of AS-event genes signature risk score distribution. (A) ALL (B) AA (C) AD (D) AP (E) AT (F) ES (G) RI.


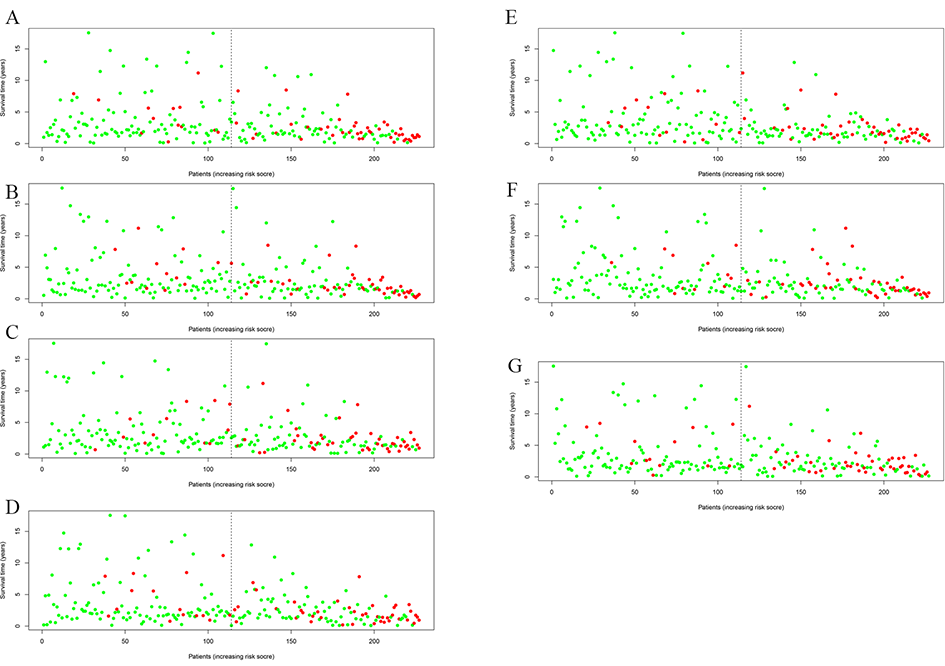


**Figure S7** The risk scores for all patients in TCGA cohort are plotted in ascending order and marked as low risk (green) or high risk (red), as divided by the threshold (vertical black line). (A) ALL (B) AA (C) AD (D) AP (E) AT (F) ES (G) RI.


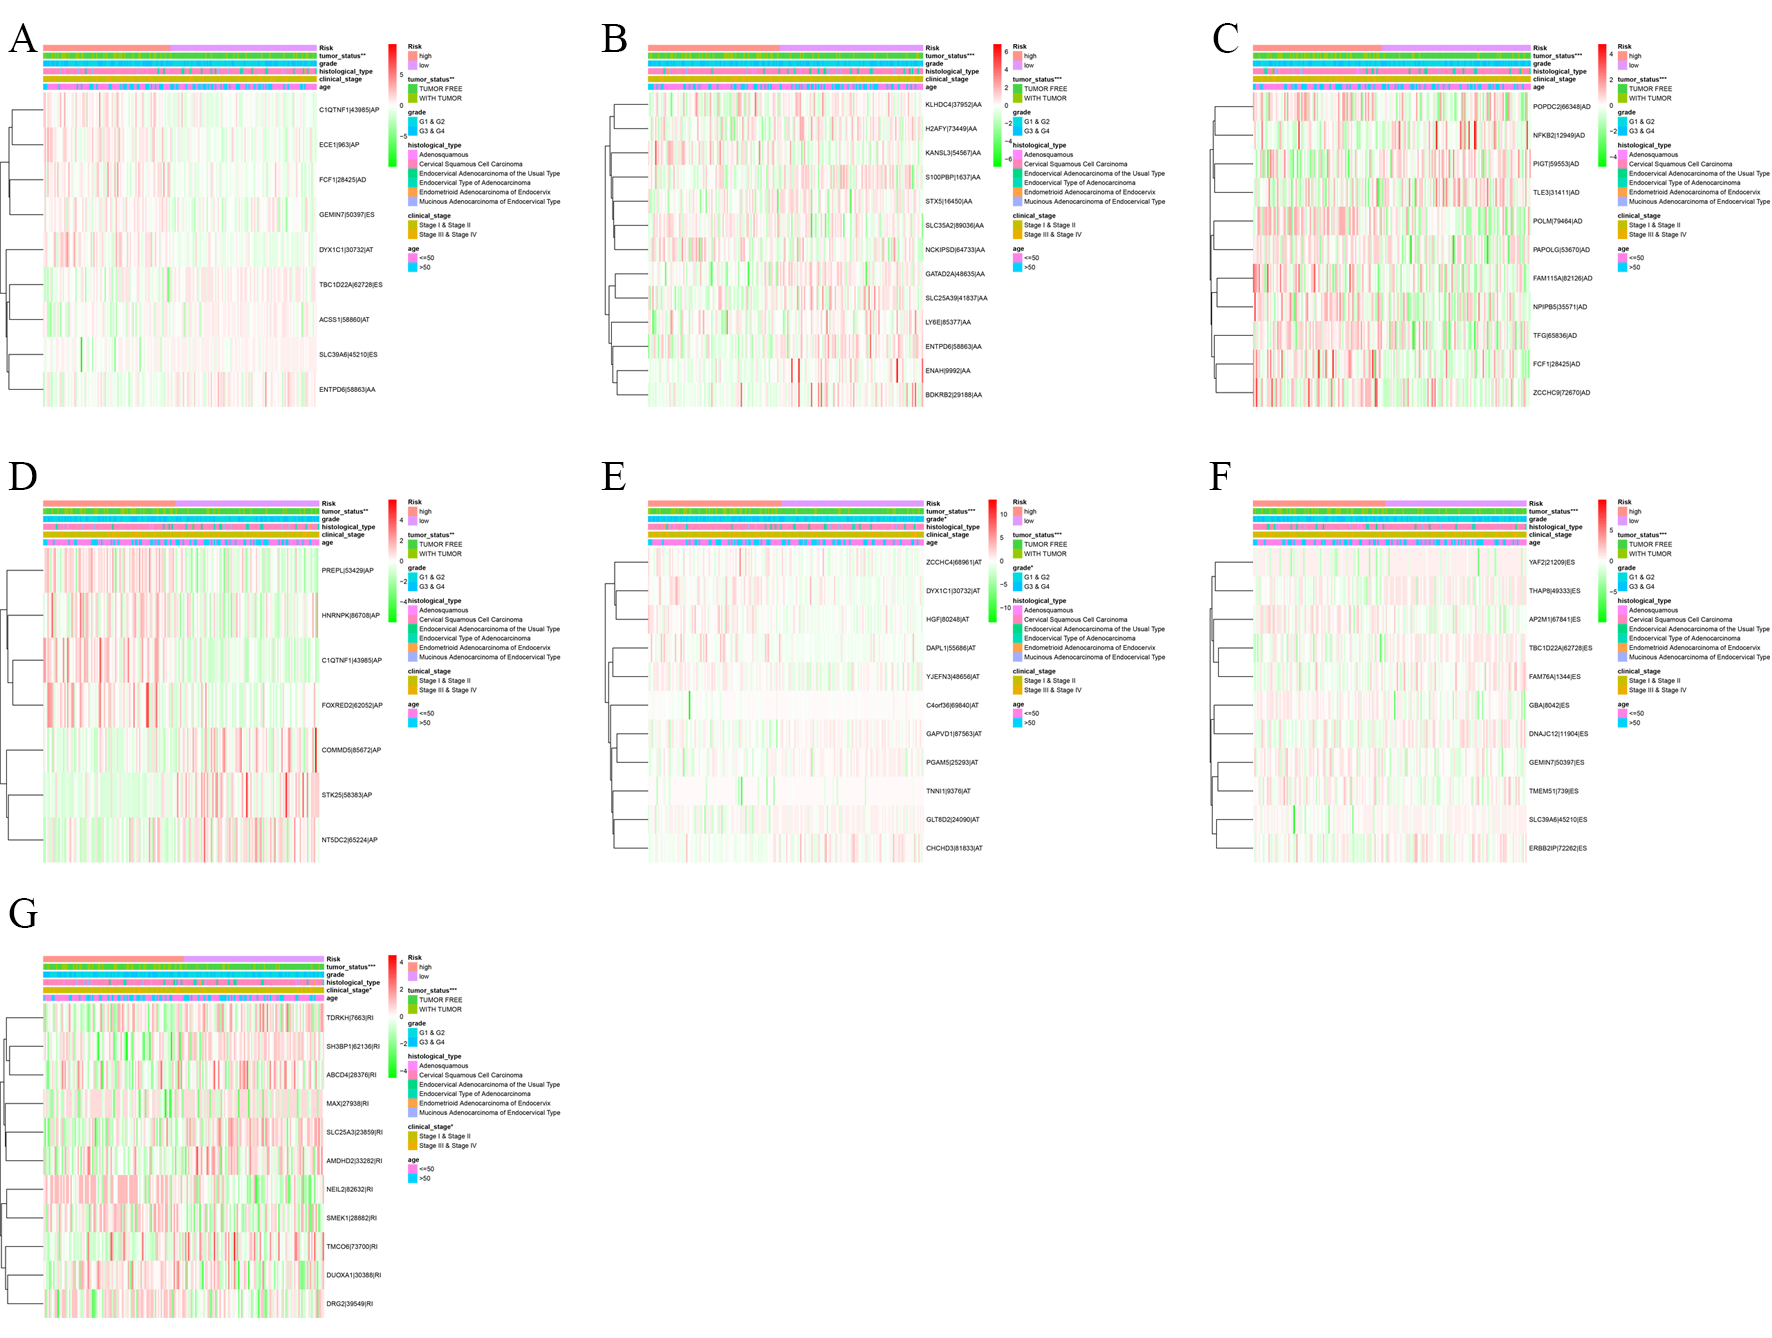


**Figure S8** Heatmap and clinicopathologic features of7 types of AS-event genes. (A) ALL (B) AA (C) AD (D) AP (E) AT (F) ES (G) RI.

| **Table S1 402 genes of Survival‐associated AS events from univariate Cox regression analysis.** | | | | | |
| --- | --- | --- | --- | --- | --- |
| id | z | HR | HR.95L | HR.95H | pvalue |
| FCF1|28425|AD | 5.0467 | 1508.5735 | 87.92543 | 25883.228 | 4.50E-07 |
| C1QTNF1|43985|AP | 4.7151 | 64.683848 | 11.431285 | 366.0131 | 2.42E-06 |
| FOXRED2|62052|AP | 4.3434 | 139.26352 | 15.011779 | 1291.9407 | 1.40E-05 |
| MFSD12|46693|AP | -4.186 | 0.0392461 | 0.0086176 | 0.1787324 | 2.84E-05 |
| TBC1D22A|62728|ES | -4.075 | 1.64E-12 | 3.53E-18 | 7.65E-07 | 4.60E-05 |
| ECE1|963|AP | 4.0435 | 332.07341 | 19.913664 | 5537.5418 | 5.27E-05 |
| NPDC1|88261|AP | 3.9316 | 33.665449 | 5.8325746 | 194.31598 | 8.44E-05 |
| SLC39A6|45210|ES | -3.8377 | 6.48E-07 | 4.48E-10 | 0.0009376 | 0.00012417 |
| GEMIN7|50397|ES | 3.8232 | 306.50338 | 16.283724 | 5769.2158 | 0.000131747 |
| ACSS1|58860|AT | -3.7977 | 0.0002462 | 3.38E-06 | 0.0179338 | 0.000146033 |
| SLC25A3|23859|RI | -3.661 | 0.0022954 | 8.87E-05 | 0.0593978 | 0.000251266 |
| MCC|73004|AP | -3.6382 | 0.1037607 | 0.0306158 | 0.3516577 | 0.000274597 |
| GEMIN4|38259|AP | -3.5902 | 0.0687686 | 0.0159477 | 0.2965405 | 0.000330432 |
| HGSNAT|83760|AP | -3.554 | 4.34E-10 | 2.97E-15 | 6.32E-05 | 0.000379437 |
| WTAP|78310|AP | -3.4461 | 0.033456 | 0.0048447 | 0.231035 | 0.000568746 |
| SRSF2|43667|AD | 3.3853 | 14580.994 | 56.63974 | 3753643.4 | 0.000710956 |
| SLC16A5|43347|AP | 3.3844 | 39.256662 | 4.6865238 | 328.83339 | 0.00071334 |
| ENTPD6|58863|AA | -3.3569 | 0.0012883 | 2.65E-05 | 0.062715 | 0.000788274 |
| DYX1C1|30732|AT | 3.3421 | 1257.6915 | 19.135951 | 82660.536 | 0.000831408 |
| LTBP3|16862|AP | 3.3343 | 13.953806 | 2.9636317 | 65.699357 | 0.000855093 |
| TNNI1|9376|AT | -3.3116 | 9.46E-05 | 3.93E-07 | 0.0227822 | 0.000927533 |
| ZCCHC4|68961|AT | 3.3088 | 2859.8895 | 25.644303 | 318938.99 | 0.000936934 |
| STK25|58383|AP | -3.3069 | 0.0212589 | 0.0021692 | 0.2083461 | 0.000943299 |
| AP2M1|67841|ES | 3.2974 | 126.4765 | 7.1215714 | 2246.1764 | 0.0009759 |
| SLC6A9|2538|AT | 3.2895 | 8030.0216 | 37.863542 | 1702990.3 | 0.001003506 |
| HNRNPK|86708|AP | 3.2447 | 36375.531 | 63.945658 | 20692245 | 0.001175925 |
| CAMKK2|24848|AP | 3.2384 | 13.332904 | 2.7803183 | 63.937405 | 0.001201951 |
| LEMD2|75766|AP | 3.2256 | 9.2467559 | 2.3934426 | 35.723645 | 0.001257196 |
| MAP7D1|1756|AP | -3.1879 | 0.0195001 | 0.0017328 | 0.2194491 | 0.001432924 |
| NEIL2|82632|RI | 3.1854 | 17.7279 | 3.0224457 | 103.9815 | 0.001445642 |
| PREPL|53429|AP | 3.1801 | 11.865446 | 2.5833376 | 54.498801 | 0.001472207 |
| ZFHX3|37558|AP | 3.1485 | 27.105889 | 3.4750688 | 211.42868 | 0.001641261 |
| GAPVD1|87563|AT | -3.1463 | 2.21E-16 | 3.91E-26 | 1.25E-06 | 0.001653442 |
| MMS19|12716|ES | 3.1385 | 60762110 | 837.14411 | 4.41E+12 | 0.001698248 |
| COMMD5|85672|AP | -3.1249 | 0.0002042 | 9.90E-07 | 0.042112 | 0.00177885 |
| UBE2J2|48|ES | 3.1047 | 10484.753 | 30.366911 | 3620060.2 | 0.001904895 |
| ZCCHC9|72670|AD | 3.0969 | 380.46008 | 8.8567656 | 16343.424 | 0.001955679 |
| ERBB2IP|72262|ES | -3.0869 | 0.1019546 | 0.0239226 | 0.434516 | 0.002022796 |
| RPL23|94524|AA | -3.0783 | 0.0599545 | 0.009992 | 0.3597403 | 0.002081917 |
| DAPL1|55686|AT | 3.0744 | 3.817855 | 1.6251726 | 8.9689038 | 0.002109476 |
| NT5DC2|65224|AP | -3.0739 | 0.0653159 | 0.0114673 | 0.3720295 | 0.002112718 |
| SLC39A6|45211|AD | 3.0685 | 1335.9795 | 13.466843 | 132535.98 | 0.002151037 |
| MXRA7|43610|AP | -3.0595 | 0.0223812 | 0.0019624 | 0.2552545 | 0.002217047 |
| GFER|33180|AP | -3.0572 | 0.0210741 | 0.0017746 | 0.2502668 | 0.002234443 |
| CAMKK2|24845|AP | -3.0503 | 0.0722324 | 0.0133477 | 0.3908923 | 0.002286308 |
| FAM115A|82126|AD | 3.0466 | 192.3526 | 6.5262738 | 5669.3181 | 0.00231458 |
| DTNB|52868|ES | -3.0462 | 0.0001301 | 4.11E-07 | 0.0411534 | 0.002317652 |
| OSGEPL1|56531|ES | -3.0454 | 1.49E-11 | 1.60E-18 | 0.0001383 | 0.002323827 |
| DLD|81376|AT | -3.0435 | 0.0007879 | 7.90E-06 | 0.0785392 | 0.00233838 |
| DLD|81377|AT | 3.0432 | 1268.221 | 12.723606 | 126409.5 | 0.002340544 |
| AMMECR1|89875|AP | -3.0403 | 1.11E-26 | 2.07E-43 | 6.00E-10 | 0.002363662 |
| TFAP2C|59883|AP | -3.0392 | 0.0030698 | 7.35E-05 | 0.1281321 | 0.002372062 |
| ESR2|27867|AT | 3.0064 | 390.14059 | 7.9780581 | 19078.537 | 0.002644039 |
| PBX1|8787|AT | -3.0052 | 1.60E-07 | 5.91E-12 | 0.0043267 | 0.002653647 |
| HGF|80248|AT | 3.0033 | 8.233676 | 2.0800657 | 32.591961 | 0.00267056 |
| NTPCR|10317|AT | -2.996 | 0.0012235 | 1.52E-05 | 0.0983676 | 0.002735109 |
| YAF2|21209|ES | -2.9908 | 1.08E-07 | 2.92E-12 | 0.0039661 | 0.002782691 |
| KSR1|39847|AP | 2.9696 | 51.324947 | 3.8151696 | 690.46738 | 0.002981411 |
| GLT8D2|24090|AT | -2.964 | 1.29E-11 | 8.18E-19 | 0.0002051 | 0.003036783 |
| CNOT2|23374|ES | -2.9582 | 2.23E-07 | 8.76E-12 | 0.0056984 | 0.003094619 |
| GBA|8042|ES | 2.9404 | 1.271E+18 | 1088228.7 | 1.48E+30 | 0.003277394 |
| GATAD2A|48635|AA | -2.937 | 2.94E-05 | 2.78E-08 | 0.0310672 | 0.00331359 |
| H3F3A|10005|AP | 2.9305 | 10.853469 | 2.2027249 | 53.47821 | 0.003384352 |
| PDK1|55972|AP | -2.9245 | 0.0889404 | 0.0175707 | 0.4502039 | 0.003450529 |
| RAB34|39954|AP | -2.9161 | 0.0089503 | 0.000376 | 0.2130375 | 0.00354464 |
| RAB34|39953|AP | 2.916 | 111.70955 | 4.6932573 | 2658.9258 | 0.003545743 |
| PPP1R7|58335|ES | 2.9056 | 37992402 | 292.95215 | 4.927E+12 | 0.003665749 |
| PGAM5|25293|AT | -2.9045 | 3.96E-11 | 3.79E-18 | 0.0004143 | 0.003678316 |
| ENAH|9992|AA | -2.902 | 0.0022701 | 3.72E-05 | 0.1385946 | 0.003708208 |
| AK3|85777|ES | -2.8926 | 4.83E-13 | 2.18E-21 | 0.0001069 | 0.003821157 |
| SHC1|7855|AP | 2.8857 | 6.1522263 | 1.7911232 | 21.131929 | 0.003905245 |
| TMUB1|82345|AP | 2.8853 | 31.11263 | 3.0115291 | 321.42999 | 0.0039107 |
| UBA52|48478|AD | 2.8822 | 16.896673 | 2.4709879 | 115.53985 | 0.003948951 |
| PIGT|59553|AD | -2.8737 | 0.090092 | 0.0174481 | 0.4651839 | 0.004056835 |
| CAPRIN1|14941|AP | 2.8546 | 12.818387 | 2.2243417 | 73.869519 | 0.004308861 |
| NDE1|34184|AT | 2.8503 | 18.215567 | 2.4757711 | 134.02163 | 0.00436819 |
| SULT1A1|35814|AP | 2.8491 | 612.76082 | 7.4109991 | 50664.67 | 0.004383698 |
| FAM76A|1344|ES | -2.8406 | 0.086368 | 0.015939 | 0.4679979 | 0.004502508 |
| NKIRAS2|40976|AP | 2.8369 | 1061053.1 | 72.879076 | 1.545E+10 | 0.004555963 |
| DNAJC12|11904|ES | -2.8351 | 0.2478845 | 0.0945092 | 0.6501667 | 0.00458184 |
| PPAN|47459|AP | 2.8335 | 116.58288 | 4.3361846 | 3134.4531 | 0.004604484 |
| ANKRD54|62161|AP | 2.8188 | 8.2925207 | 1.9050579 | 36.096489 | 0.004820259 |
| ZNF395|83211|AP | 2.8087 | 18.875562 | 2.4297499 | 146.6352 | 0.004973771 |
| C4orf36|69840|AT | -2.8042 | 0.0118101 | 0.0005307 | 0.2628003 | 0.005044035 |
| CUL7|76216|AP | 2.7986 | 12.463984 | 2.129685 | 72.945478 | 0.00513317 |
| TMEM51|739|ES | 2.7845 | 13.726527 | 2.1718847 | 86.753011 | 0.005361811 |
| WNT7B|62673|AP | -2.7812 | 0.0150348 | 0.0007806 | 0.2895697 | 0.00541663 |
| CAPG|54271|AP | 2.7802 | 85.338217 | 3.7132151 | 1961.2683 | 0.005432226 |
| TRADD|36927|AP | -2.7778 | 0.0211513 | 0.0013923 | 0.3213302 | 0.00547296 |
| CHEK1|19309|AP | 2.7717 | 11.149774 | 2.0263044 | 61.35182 | 0.005576676 |
| NNT|71963|AP | -2.7707 | 0.0676683 | 0.0100699 | 0.4547226 | 0.005592911 |
| CHRNB1|38960|AP | 2.7619 | 11.933501 | 2.0541712 | 69.326471 | 0.005747248 |
| RGS19|60190|AP | -2.7603 | 0.0750973 | 0.0119469 | 0.4720568 | 0.005774936 |
| THAP8|49333|ES | -2.7573 | 0.0043876 | 9.25E-05 | 0.2080772 | 0.00582889 |
| KANK3|47222|AT | -2.7403 | 0.0661057 | 0.0094718 | 0.4613667 | 0.006138222 |
| CABYR|44862|ES | -2.7339 | 0.0039784 | 7.57E-05 | 0.2091881 | 0.006259846 |
| TMEM150A|54299|AP | -2.7323 | 0.0709494 | 0.0106341 | 0.4733659 | 0.006289254 |
| RNF166|38013|AP | -2.7308 | 0.0798363 | 0.0130102 | 0.4899103 | 0.006317928 |
| S100PBP|1637|AA | -2.7258 | 0.0175098 | 0.0009553 | 0.3209496 | 0.006414636 |
| CDK10|38109|AP | -2.7236 | 0.0036507 | 6.43E-05 | 0.2072694 | 0.00645719 |
| CSF2RA|88369|ES | 2.7236 | 7.8462367 | 1.7817393 | 34.552434 | 0.00645736 |
| POMZP3|80186|ES | -2.718 | 1.62E-05 | 5.72E-09 | 0.0461597 | 0.006567553 |
| MTIF2|53607|ES | -2.7137 | 0.0516212 | 0.0060698 | 0.4390186 | 0.006653511 |
| TSPO|62571|AP | 2.7057 | 71864384 | 146.33832 | 3.529E+13 | 0.006816333 |
| ACOT7|390|AP | -2.6985 | 0.0006183 | 2.89E-06 | 0.1323825 | 0.00696613 |
| TROVE2|9250|AP | 2.6982 | 11.292516 | 1.9410759 | 65.696 | 0.006971875 |
| TLE3|31411|AD | -2.6965 | 0.0067243 | 0.0001773 | 0.2550633 | 0.007007808 |
| YJEFN3|48656|AT | 2.6959 | 8.6987959 | 1.8049546 | 41.922967 | 0.007019083 |
| STAMBPL1|12468|AP | 2.6903 | 12.837185 | 1.9994766 | 82.418229 | 0.007138787 |
| ENTPD1|12653|AP | 2.6781 | 19.662292 | 2.2226604 | 173.93828 | 0.007405147 |
| GALNT4|23640|AP | 2.6774 | 42.320235 | 2.7281629 | 656.48657 | 0.007418577 |
| MED4|25852|AD | 2.675 | 225.31314 | 4.254884 | 11931.233 | 0.007473603 |
| CHCHD3|81833|AT | -2.6747 | 0.0105919 | 0.0003782 | 0.2966524 | 0.007480302 |
| AMDHD2|33282|RI | -2.671 | 0.0242303 | 0.0015805 | 0.3714675 | 0.007563275 |
| TUBB3|38166|AP | -2.6686 | 0.0038312 | 6.43E-05 | 0.2281816 | 0.007617343 |
| YY1AP1|8095|AP | -2.6675 | 0.0355432 | 0.0030615 | 0.4126539 | 0.007641084 |
| ZNF384|19923|ES | -2.6662 | 0.0162252 | 0.0007843 | 0.3356504 | 0.007670501 |
| HEATR1|10395|AT | -2.6612 | 1.77E-10 | 1.17E-17 | 0.0026939 | 0.007785542 |
| S100A2|91124|ES | 2.6607 | 26.54996 | 2.3717396 | 297.20818 | 0.007796782 |
| KDM2B|24876|AT | -2.6514 | 0.0001102 | 1.31E-07 | 0.0928584 | 0.008015625 |
| SLC50A1|7944|ES | 2.6504 | 764.76713 | 5.6385213 | 103727.33 | 0.008039698 |
| CEP135|69337|AT | 2.6425 | 5307.906 | 9.1650404 | 3074058.1 | 0.008229243 |
| TC2N|28884|AP | 2.6393 | 23.59681 | 2.2561474 | 246.79657 | 0.008307404 |
| C2CD5|20733|ES | 2.6362 | 17.543408 | 2.0851203 | 147.60355 | 0.008384597 |
| RBM6|64945|ES | -2.6352 | 0.0069025 | 0.0001705 | 0.2794272 | 0.00840859 |
| TMLHE|90682|AT | 2.6352 | 40.635439 | 2.5837018 | 639.0981 | 0.008409795 |
| DENND2D|4141|AP | -2.6319 | 0.0550625 | 0.0063558 | 0.4770224 | 0.008491161 |
| ZNF638|53927|AP | 2.6212 | 85.388453 | 3.0706264 | 2374.4953 | 0.00876193 |
| GABPB1|30577|ES | -2.6183 | 6.17E-10 | 7.87E-17 | 0.0048354 | 0.008838125 |
| USP48|995|AP | 2.6165 | 8.4613746 | 1.708853 | 41.896441 | 0.008884628 |
| FUT8|28010|AP | 2.5955 | 7.2700679 | 1.6253808 | 32.517848 | 0.009445538 |
| TRIP10|47083|ES | -2.5935 | 0.0581473 | 0.0067744 | 0.4990978 | 0.009499252 |
| DPM1|59794|ES | -2.5931 | 3.13E-09 | 1.17E-15 | 0.0083858 | 0.00951165 |
| ZNF7|85657|AT | 2.5846 | 346.30631 | 4.1092644 | 29184.8 | 0.00974779 |
| MAX|27960|ES | -2.5814 | 0.0005367 | 1.76E-06 | 0.1632183 | 0.00984114 |
| NFX1|86101|AT | -2.5727 | 0.0121096 | 0.0004195 | 0.3495254 | 0.01009175 |
| ZNF606|52383|AD | 2.5722 | 5.8738625 | 1.5241177 | 22.63753 | 0.010105579 |
| ZNF33A|11308|AT | 2.5701 | 39.351385 | 2.3913849 | 647.54592 | 0.010166326 |
| CXADR|60227|AT | 2.5657 | 32.260766 | 2.2707481 | 458.33223 | 0.010297709 |
| TMEM62|30209|AP | 2.5655 | 7.7550555 | 1.6217184 | 37.084667 | 0.010302011 |
| CD96|66049|AT | -2.5644 | 0.0382245 | 0.0031538 | 0.4632836 | 0.010334935 |
| NGLY1|63751|AP | -2.5572 | 0.0364516 | 0.0028798 | 0.4613885 | 0.010550369 |
| YLPM1|28426|AT | 2.5569 | 940162.21 | 24.798358 | 3.564E+10 | 0.010562415 |
| ASH2L|83368|AP | -2.5563 | 0.0112592 | 0.000361 | 0.3511419 | 0.010580689 |
| GOLGA7|83513|AA | 2.5531 | 1349.1476 | 5.3354148 | 341154.19 | 0.010677112 |
| C11orf48|16384|AP | -2.5531 | 0.0003304 | 7.03E-07 | 0.1553498 | 0.010677357 |
| NARF|44391|AP | 2.5456 | 273.48445 | 3.6359389 | 20570.683 | 0.010909843 |
| SH3BP1|62136|RI | -2.5394 | 6.99E-12 | 1.72E-20 | 0.0028484 | 0.011104798 |
| TNFSF12|38966|AT | -2.5389 | 0.0168878 | 0.0007233 | 0.3943176 | 0.011120526 |
| HECTD3|2592|RI | -2.5336 | 5.99E-05 | 3.24E-08 | 0.1106401 | 0.011290373 |
| ZZZ3|3526|AP | -2.5299 | 0.1085824 | 0.0194427 | 0.6064051 | 0.011408068 |
| EML3|16359|AP | 2.5275 | 6.8484216 | 1.5403732 | 30.447737 | 0.011487939 |
| PLIN2|85960|AT | -2.5272 | 1.38E-05 | 2.35E-09 | 0.081134 | 0.011498178 |
| HPSE|69782|ES | 2.5251 | 4.50E+44 | 9.873E+09 | 2.05E+79 | 0.011564947 |
| PPP1R21|53521|AP | -2.5234 | 0.0012124 | 6.58E-06 | 0.2232731 | 0.011622978 |
| ENO3|38620|AT | -2.5171 | 0.0531162 | 0.0054026 | 0.5222135 | 0.011833112 |
| NF2|61661|ES | -2.5138 | 0.0143508 | 0.0005246 | 0.392585 | 0.011944258 |
| TNFRSF13B|39449|AT | -2.5134 | 0.2077325 | 0.0609959 | 0.7074703 | 0.011955721 |
| TBC1D1|69014|AT | -2.5071 | 0.0027155 | 2.68E-05 | 0.2754057 | 0.012172517 |
| KIAA0226|68302|AP | -2.4994 | 0.1895365 | 0.0514361 | 0.6984221 | 0.012442048 |
| PLEKHB2|55368|AP | 2.497 | 10.885011 | 1.6710956 | 70.901666 | 0.012524037 |
| LRFN4|17140|AP | -2.495 | 0.0055675 | 9.43E-05 | 0.3285542 | 0.012597484 |
| LY6E|85377|AA | -2.4894 | 0.0572998 | 0.0060313 | 0.5443758 | 0.012796804 |
| TM9SF1|26891|AP | -2.4835 | 0.0386341 | 0.0029635 | 0.5036631 | 0.013011039 |
| C11orf30|17890|AT | 2.4802 | 399.12522 | 3.5124074 | 45353.777 | 0.013130538 |
| LSP1|13865|AP | -2.48 | 0.0630365 | 0.007094 | 0.5601348 | 0.013139058 |
| UBXN2A|52795|AP | -2.4792 | 0.0784779 | 0.0104948 | 0.5868434 | 0.013168046 |
| MRPL23|13894|AT | 2.4741 | 37.441241 | 2.1230937 | 660.28482 | 0.013356079 |
| PAM|72902|ES | 2.4723 | 39.898342 | 2.1466072 | 741.57846 | 0.013425713 |
| CEP57L1|77169|AA | 2.4717 | 252.39776 | 3.1427867 | 20270.11 | 0.013447634 |
| IPO11|72188|AP | 2.4714 | 220.35251 | 3.0541232 | 15898.254 | 0.013458646 |
| PLAC8|69771|AP | -2.4709 | 0.1999646 | 0.0557777 | 0.716878 | 0.013476532 |
| AFMID|43807|ES | -2.469 | 0.000237 | 3.14E-07 | 0.1788984 | 0.013549454 |
| CXCL12|11343|AT | -2.4672 | 0.228516 | 0.0707355 | 0.7382373 | 0.013616961 |
| SLC35A2|89036|AA | 2.465 | 245.13635 | 3.0871384 | 19465.221 | 0.013700946 |
| CYB561A3|16158|AP | 2.4629 | 193064291 | 49.21433 | 7.574E+14 | 0.013780235 |
| PBX3|87588|AP | -2.4623 | 0.0007426 | 2.40E-06 | 0.2299282 | 0.013804425 |
| RIPK1|75164|ES | -2.4619 | 6.51E-07 | 7.74E-12 | 0.0547918 | 0.013820283 |
| NCKIPSD|64733|AA | 2.4605 | 21.188562 | 1.8611028 | 241.23071 | 0.013874049 |
| STOML1|31621|ES | -2.457 | 0.0303524 | 0.0018682 | 0.4931203 | 0.014009942 |
| SMEK1|28882|RI | 2.456 | 20.183647 | 1.8347965 | 222.02985 | 0.014047624 |
| ARMC6|48567|ES | -2.453 | 0.0164062 | 0.0006149 | 0.437743 | 0.014166365 |
| ARHGAP9|22584|AP | 2.4518 | 26.047291 | 1.9231866 | 352.77978 | 0.014212943 |
| EPN1|52139|ES | 2.4513 | 2.257E+11 | 188.62183 | 2.70E+20 | 0.014235166 |
| ARFGAP2|15642|ES | 2.4497 | 58.979363 | 2.2593012 | 1539.6642 | 0.014298794 |
| KCTD10|24290|AP | -2.4466 | 0.0367057 | 0.0025999 | 0.5182095 | 0.014419727 |
| TMEM205|47661|ES | -2.4466 | 0.0006822 | 1.98E-06 | 0.2345526 | 0.014420613 |
| PIGQ|32900|AP | 2.4426 | 30.062721 | 1.9590191 | 461.33658 | 0.014582435 |
| NPIPB5|35571|AD | 2.4417 | 29.061641 | 1.9440293 | 434.44765 | 0.014618577 |
| TUBGCP2|13529|AP | 2.4387 | 14.297073 | 1.6857455 | 121.25572 | 0.014739353 |
| TFG|65836|AD | 2.435 | 74.22513 | 2.3170802 | 2377.7208 | 0.014890357 |
| NAE1|36875|ES | 2.4296 | 3798872.7 | 18.694933 | 7.719E+11 | 0.015117556 |
| ASAH1|82844|AP | -2.4285 | 0.0006581 | 1.78E-06 | 0.243326 | 0.01516302 |
| FBLIM1|773|AT | -2.4267 | 0.003498 | 3.63E-05 | 0.3369776 | 0.015237173 |
| COX15|12777|AT | -2.4232 | 0.0032977 | 3.24E-05 | 0.3354079 | 0.01538494 |
| STX5|16450|AA | -2.4182 | 3.79E-05 | 9.89E-09 | 0.1452602 | 0.015596409 |
| TECR|564144|ES | -2.4089 | 2.61E-05 | 4.86E-09 | 0.1398651 | 0.015999738 |
| SEC31A|69720|AP | -2.4059 | 0.1011404 | 0.0156422 | 0.6539625 | 0.016131505 |
| DMPK|50522|ES | 2.4059 | 70.083978 | 2.1982872 | 2234.3595 | 0.016132883 |
| TLCD1|39969|AP | -2.4053 | 0.0286807 | 0.0015876 | 0.5181291 | 0.016160189 |
| FES|32501|ES | -2.3987 | 0.0185814 | 0.0007158 | 0.4823737 | 0.016451807 |
| KIAA1328|45287|AT | -2.3901 | 0.0015295 | 7.51E-06 | 0.3113734 | 0.016842203 |
| SCO2|62849|AD | 2.3873 | 56.064444 | 2.0559422 | 1528.8474 | 0.016973479 |
| EMP1|20539|ES | 2.385 | 4.405E+12 | 179.20329 | 1.08E+23 | 0.017078616 |
| AAED1|86980|ES | 2.3841 | 67.021689 | 2.1130853 | 2125.7574 | 0.01711875 |
| EBPL|25899|AT | 2.3795 | 1171.6176 | 3.4757199 | 394936.29 | 0.017337077 |
| STK32C|13485|AP | 2.3782 | 41.850221 | 1.9283725 | 908.24829 | 0.017397788 |
| ERRFI1|531|AT | 2.375 | 2.66E+20 | 3709.5556 | 1.90E+37 | 0.01754799 |
| TMUB2|41797|ES | -2.3705 | 0.0494034 | 0.0041092 | 0.5939615 | 0.017761999 |
| WDR83|47821|AA | 2.368 | 4453.1867 | 4.2533273 | 4662437.3 | 0.017883885 |
| MPV17|52961|AP | 2.3677 | 12306.564 | 5.0619214 | 29919770 | 0.017900308 |
| SLC25A39|41837|AA | -2.3638 | 0.0173873 | 0.0006041 | 0.5004173 | 0.018086531 |
| IMPA1|84299|ES | 2.3598 | 5608.731 | 4.3177201 | 7285758 | 0.018282535 |
| STK25|58385|AP | 2.3583 | 15.493193 | 1.5885647 | 151.10434 | 0.018361154 |
| AMPD2|4047|AP | 2.3563 | 55.575249 | 1.9655256 | 1571.3905 | 0.01845922 |
| VPS18|30060|ES | -2.3511 | 0.0015684 | 7.20E-06 | 0.3415273 | 0.018717908 |
| GIT2|24376|ES | -2.3501 | 4.94E-07 | 2.72E-12 | 0.0897446 | 0.018765906 |
| POPDC2|66348|AD | 2.3476 | 17.417776 | 1.6029373 | 189.26436 | 0.018894379 |
| SMCO4|18299|AP | 2.3448 | 6.5923133 | 1.36273 | 31.890834 | 0.019039612 |
| TDRKH|7663|RI | -2.3373 | 0.1123607 | 0.0179684 | 0.702618 | 0.019421914 |
| TMEM106A|41699|ES | -2.3364 | 0.0338283 | 0.0019747 | 0.5795051 | 0.019472055 |
| BDKRB2|29188|AA | -2.3329 | 0.1007798 | 0.0146572 | 0.6929392 | 0.019655631 |
| RAMP2|41120|AP | 2.3318 | 106.72599 | 2.1058427 | 5408.9687 | 0.019711811 |
| RUNX2|76401|AT | -2.3312 | 0.0170476 | 0.0005558 | 0.5228793 | 0.019743101 |
| EGFL7|88188|AP | 2.33 | 3.233855 | 1.204893 | 8.6794584 | 0.019806772 |
| SCO2|62846|AP | -2.3297 | 0.1905721 | 0.0472481 | 0.7686597 | 0.019820507 |
| POLM|79464|AD | 2.3251 | 58.4934 | 1.8945482 | 1805.9597 | 0.020066826 |
| IL32|33442|AD | -2.3226 | 0.0010154 | 3.02E-06 | 0.3408753 | 0.02019876 |
| EIF3K|49681|ES | -2.3221 | 0.0001388 | 7.69E-08 | 0.2502787 | 0.020229473 |
| CBX3|79041|AP | 2.322 | 284215.69 | 7.0849644 | 1.14E+10 | 0.020232151 |
| FAM204A|13247|ES | 2.3213 | 83.952765 | 1.9928224 | 3536.7259 | 0.020272872 |
| ZC3H13|25815|AA | -2.3195 | 0.0339993 | 0.0019523 | 0.5920846 | 0.020369413 |
| NEK3|25987|AP | 2.3163 | 12.848451 | 1.4810885 | 111.4604 | 0.020542284 |
| GPATCH2L|28539|AP | 2.3149 | 50.171018 | 1.8227102 | 1380.9826 | 0.020619043 |
| AP4M1|80885|AP | -2.3091 | 0.0591511 | 0.0053653 | 0.6521229 | 0.020939109 |
| EP400|25233|ES | 2.3084 | 46.194864 | 1.7833621 | 1196.5969 | 0.020978593 |
| GMIP|48671|ES | 2.301 | 1299704.7 | 8.0580406 | 2.096E+11 | 0.021389539 |
| CYB561A3|16167|ES | -2.2941 | 1.49E-06 | 1.56E-11 | 0.1416681 | 0.021785546 |
| DAG1|64873|AP | 2.2929 | 12.676572 | 1.4460183 | 111.12963 | 0.021851721 |
| NFKB2|12949|AD | -2.2915 | 0.0279928 | 0.0013145 | 0.5961316 | 0.021936985 |
| ANGPT2|82578|AT | 2.289 | 102.9266 | 1.94682 | 5441.636 | 0.022076902 |
| RNASE1|26472|ES | 2.2853 | 33834.126 | 4.4137792 | 259357802 | 0.02229489 |
| PAPOLG|53670|AD | 2.285 | 119.7531 | 1.9752249 | 7260.3401 | 0.022313954 |
| ARL6IP4|25029|AD | 2.2813 | 109.86954 | 1.9384626 | 6227.263 | 0.022531738 |
| UCHL5|9239|AT | 2.2806 | 108.0727 | 1.931562 | 6046.769 | 0.02257346 |
| ANKRD13D|17156|AP | -2.2793 | 0.1130244 | 0.0173377 | 0.7368047 | 0.022650155 |
| CARD8|50710|AA | 2.2771 | 31.780667 | 1.6189525 | 623.86685 | 0.022777622 |
| PIP5K1A|7580|ES | -2.2757 | 0.0023214 | 1.25E-05 | 0.431052 | 0.02286462 |
| SSB|55881|AP | -2.2689 | 0.0006333 | 1.09E-06 | 0.3668374 | 0.023272851 |
| SSB|55882|AP | 2.2689 | 1578.995 | 2.726003 | 914608.38 | 0.023272851 |
| KANSL3|54567|AA | 2.2678 | 13.978848 | 1.4304594 | 136.60519 | 0.023343241 |
| GJB2|25420|AP | -2.2652 | 0.0035574 | 2.71E-05 | 0.4677416 | 0.023499847 |
| AKT1S1|51109|AP | 2.2644 | 91.80413 | 1.8360156 | 4590.3741 | 0.023551127 |
| KLHDC4|37952|AA | -2.2628 | 0.0084289 | 0.0001346 | 0.5277446 | 0.023649823 |
| CUZD1|13376|AP | 2.261 | 17.313435 | 1.4617166 | 205.07055 | 0.023761698 |
| HSPH1|25576|ES | -2.2609 | 9.91E-06 | 4.55E-10 | 0.2157679 | 0.02376694 |
| YY1AP1|8098|AP | 2.2589 | 15.38407 | 1.4358326 | 164.83093 | 0.023888192 |
| CHPF|57718|AP | 2.2533 | 4986.9261 | 3.0295812 | 8208868 | 0.0242404 |
| LGMN|29011|ES | -2.2526 | 0.1157263 | 0.0177234 | 0.7556433 | 0.024282066 |
| RNF212|68450|AT | 2.2429 | 4.5368124 | 1.2101609 | 17.008207 | 0.024904345 |
| EMC6|38483|AD | -2.241 | 0.0782643 | 0.0084307 | 0.7265499 | 0.025029036 |
| CYP51A1|80417|AP | 2.2394 | 466.02161 | 2.1527093 | 100885.03 | 0.025128823 |
| IFT122|66727|ES | 2.2391 | 338.12594 | 2.0665477 | 55323.742 | 0.02515208 |
| UBE2W|84190|AT | -2.2366 | 3.67E-05 | 4.77E-09 | 0.282743 | 0.025311466 |
| AURKAIP1|148|RI | -2.2316 | 0.0654163 | 0.0059639 | 0.7175313 | 0.025641209 |
| BCL6|68082|ES | 2.2292 | 166104.32 | 4.2704292 | 6.461E+09 | 0.025801578 |
| NME6|64633|AD | 2.2254 | 11.81549 | 1.3425377 | 103.98651 | 0.026052954 |
| MCCC2|72445|ES | -2.2248 | 0.0125031 | 0.0002634 | 0.5935715 | 0.026094692 |
| TGFBR3|3739|AP | 2.2234 | 7.1990419 | 1.2634514 | 41.019548 | 0.026191675 |
| CHMP3|54441|ES | -2.2198 | 2.66E-06 | 3.17E-11 | 0.222491 | 0.026431463 |
| ABL2|9103|AT | -2.2151 | 0.0003288 | 2.72E-07 | 0.3970334 | 0.026753276 |
| FBXW7|70855|RI | 2.2106 | 6.2337644 | 1.2305459 | 31.579333 | 0.027065793 |
| UBAP1|86144|AP | -2.2089 | 2.12E-05 | 1.52E-09 | 0.2974811 | 0.027184199 |
| MTFR1|83987|ES | -2.2072 | 1.59E-07 | 1.46E-13 | 0.1731542 | 0.027297903 |
| ZNF680|79826|AT | -2.2054 | 0.0022529 | 1.00E-05 | 0.5074943 | 0.027428671 |
| LRRC28|32652|ES | -2.2014 | 0.0525068 | 0.0038088 | 0.7238303 | 0.027707128 |
| SLC50A1|7941|AP | 2.1947 | 2985.7131 | 2.3531122 | 3788379.9 | 0.028186856 |
| TSPAN14|12367|AP | -2.1918 | 0.0985023 | 0.0123988 | 0.782551 | 0.028390453 |
| PLEKHG5|462|AP | -2.1906 | 0.1152014 | 0.0166626 | 0.7964778 | 0.028478397 |
| CEP57L1|77162|AD | -2.1886 | 0.0624523 | 0.0052108 | 0.748494 | 0.028627929 |
| PAPLN|28281|ES | -2.1881 | 0.0411807 | 0.0023648 | 0.7171187 | 0.028665663 |
| CHID1|13814|ES | -2.1848 | 0.0006295 | 8.46E-07 | 0.4683239 | 0.028901068 |
| ABLIM2|68748|AA | -2.1841 | 0.0872935 | 0.0097865 | 0.7786424 | 0.028957651 |
| RPL21|25526|AD | -2.1833 | 0.0201222 | 0.0006038 | 0.6705959 | 0.029011897 |
| ZNF419|52269|AT | -2.183 | 0.0076879 | 9.72E-05 | 0.6081785 | 0.029038931 |
| DNM1|87721|AT | -2.1825 | 0.0055645 | 5.26E-05 | 0.5889988 | 0.029072613 |
| GLB1|63827|AP | -2.1796 | 0.0325174 | 0.0014933 | 0.7080948 | 0.029290018 |
| NPRL3|32820|ES | -2.1749 | 1.04E-08 | 6.60E-16 | 0.1624797 | 0.029635364 |
| PLS3|89927|ES | -2.1728 | 0.1593075 | 0.0303831 | 0.8352949 | 0.029791867 |
| EHD3|53139|ES | -2.1687 | 0.004084 | 2.83E-05 | 0.5889338 | 0.030105279 |
| PALLD|71133|ES | 2.1684 | 9.890554 | 1.2464673 | 78.480242 | 0.030125338 |
| YIF1A|17004|AP | 2.1676 | 49863855 | 5.4638979 | 4.551E+14 | 0.030186147 |
| SLC35A2|89035|AT | -2.1656 | 0.0005101 | 5.34E-07 | 0.4867955 | 0.030340431 |
| MYD88|64031|ES | 2.1655 | 1.65E+11 | 11.612476 | 2.34E+21 | 0.030345673 |
| NPRL3|32818|ES | -2.1652 | 0.0009304 | 1.68E-06 | 0.5159566 | 0.030369329 |
| ZNF3|80875|AP | 2.1612 | 1035.5571 | 1.9090224 | 561742.2 | 0.030676303 |
| MZF1|52490|AD | 2.1582 | 10.361792 | 1.2395638 | 86.616544 | 0.030912529 |
| SENP7|65948|ES | -2.1535 | 0.0948557 | 0.0111191 | 0.8092005 | 0.031277208 |
| H2AFY|73449|AA | -2.1521 | 2.27E-06 | 1.65E-11 | 0.3133975 | 0.031388104 |
| FUT10|83325|AT | -2.1496 | 0.0046031 | 3.41E-05 | 0.6220626 | 0.031586678 |
| PLXNB3|90485|ES | -2.1454 | 0.1236041 | 0.0183033 | 0.8347105 | 0.031924043 |
| PCMTD2|60203|AT | 2.1453 | 45.152147 | 1.3898244 | 1466.8877 | 0.031927787 |
| BTD|63617|AP | 2.1433 | 10.227766 | 1.2200271 | 85.741696 | 0.03209019 |
| IFIT3|12489|AP | 2.1431 | 14.466312 | 1.2564503 | 166.55986 | 0.032106957 |
| LTBR|19846|AP | -2.1381 | 0.0591427 | 0.0044269 | 0.7901358 | 0.032511851 |
| STAT5A|41033|ES | -2.137 | 0.0050808 | 4.00E-05 | 0.645652 | 0.032601842 |
| TUBB3|38167|AP | 2.1369 | 3.5227785 | 1.1098802 | 11.181359 | 0.032608265 |
| TNPO2|47846|AP | 2.1365 | 7.9768628 | 1.187216 | 53.596263 | 0.03263603 |
| AURKA|59873|AD | -2.1358 | 0.0701908 | 0.0061314 | 0.8035304 | 0.03269336 |
| PABPC1L|59491|AP | -2.1353 | 0.0167493 | 0.0003925 | 0.7147517 | 0.032735268 |
| HNRNPF|11324|AP | -2.1325 | 0.0012501 | 2.68E-06 | 0.5823079 | 0.032967858 |
| DUOXA1|30388|RI | 2.1318 | 102.58138 | 1.4525278 | 7244.5697 | 0.033021383 |
| USP39|54316|RI | -2.1302 | 0.0100544 | 0.000146 | 0.6924493 | 0.033158035 |
| RPL26L1|74567|AP | 2.1287 | 181.02456 | 1.5101015 | 21700.456 | 0.033275554 |
| P4HA3|17767|AT | 2.1257 | 10.680848 | 1.2028 | 94.845789 | 0.033529115 |
| MAX|27938|RI | -2.1194 | 0.1377121 | 0.0220152 | 0.8614318 | 0.034055189 |
| CLINT1|74396|AD | -2.1182 | 7.32E-13 | 4.32E-24 | 0.1240636 | 0.034161264 |
| ALG9|18682|AP | -2.1179 | 0.1821448 | 0.0376691 | 0.8807406 | 0.034183586 |
| UBA52|48483|AD | 2.1169 | 27.704668 | 1.2791409 | 600.0501 | 0.034271705 |
| TADA2B|68734|AD | 2.1131 | 72558420 | 3.7122721 | 1.418E+15 | 0.03459278 |
| RGMA|32575|ES | 2.1116 | 38371.896 | 2.1339561 | 689987178 | 0.03472064 |
| TMCO6|73700|RI | -2.1097 | 0.0572101 | 0.0040098 | 0.816255 | 0.034886454 |
| FANCD2|63308|ES | 2.1081 | 1.928E+18 | 19.27041 | 1.93E+35 | 0.035022412 |
| RBM42|49226|ES | -2.1067 | 1.55E-09 | 9.86E-18 | 0.2433412 | 0.035140105 |
| PWWP2B|13500|AD | -2.1046 | 0.0042119 | 2.58E-05 | 0.6866698 | 0.035326351 |
| SLC38A1|21321|AP | -2.103 | 0.0045885 | 3.04E-05 | 0.6934308 | 0.035469571 |
| RABEPK|87550|AP | 2.1014 | 12.695917 | 1.1865468 | 135.84487 | 0.035605494 |
| CSTF3|14884|AT | -2.0998 | 0.0412167 | 0.0021007 | 0.8086858 | 0.03574771 |
| SLC25A10|44158|AP | 2.0987 | 32.973671 | 1.2598836 | 862.9868 | 0.03584715 |
| NF2|61660|ES | -2.0982 | 0.0910343 | 0.0097043 | 0.8539773 | 0.035890752 |
| REV1|54714|ES | -2.0975 | 0.0370953 | 0.0017078 | 0.8057515 | 0.035951128 |
| AFMID|43817|ES | 2.0919 | 3.9653671 | 1.090783 | 14.415458 | 0.036445909 |
| GRAPL|39690|AT | -2.0911 | 0.1495458 | 0.025195 | 0.8876334 | 0.036515406 |
| LPAR2|48663|AP | -2.0868 | 0.2205738 | 0.0533348 | 0.9122145 | 0.036904956 |
| AP1G1|37491|ES | 2.0812 | 129.86215 | 1.3276147 | 12702.616 | 0.037419864 |
| EGLN2|50008|AP | 2.0801 | 285105.83 | 2.0661313 | 3.934E+10 | 0.037512485 |
| UHRF2|85821|ES | -2.0748 | 0.0164929 | 0.0003414 | 0.7967305 | 0.038002838 |
| PLEKHM1|41970|AP | -2.0716 | 0.0109011 | 0.0001516 | 0.78392 | 0.038305892 |
| ARHGEF39|86272|AT | -2.0706 | 0.0944262 | 0.010115 | 0.8814932 | 0.038392532 |
| C19orf57|47943|ES | -2.0681 | 0.0653056 | 0.0049191 | 0.8669963 | 0.038627274 |
| HNRNPLL|53260|AT | -2.0655 | 0.0688506 | 0.0054349 | 0.8722097 | 0.038875299 |
| PIK3IP1|61842|ES | 2.0641 | 1286.3565 | 1.43494 | 1153158.4 | 0.039010675 |
| DUSP23|8410|AP | 2.0637 | 10.543496 | 1.1257219 | 98.750237 | 0.039044406 |
| ENTPD4|83081|AD | 2.0632 | 18.093872 | 1.1559544 | 283.21895 | 0.039090709 |
| IRAK4|21252|AD | 2.0622 | 117.25291 | 1.2665124 | 10855.2 | 0.039185685 |
| PDLIM7|74781|AA | -2.0568 | 0.0476937 | 0.0026249 | 0.8665833 | 0.039710122 |
| CHID1|13804|AP | 2.0562 | 58.722976 | 1.210043 | 2849.8061 | 0.039761416 |
| LRRC23|19997|AP | -2.0541 | 0.1695631 | 0.0311888 | 0.9218577 | 0.039961245 |
| XIAP|90027|AP | -2.053 | 0.0514048 | 0.0030229 | 0.8741378 | 0.040071522 |
| CDADC1|25880|ES | -2.0526 | 0.0038965 | 1.95E-05 | 0.7785936 | 0.040115392 |
| PPP1CC|24497|AP | 2.0511 | 31.356654 | 1.1654301 | 843.67113 | 0.040257184 |
| PAQR4|33336|AP | 2.0496 | 4.5655906 | 1.0686665 | 19.50526 | 0.040403437 |
| PLEKHG5|466|AP | 2.0491 | 13.112967 | 1.1185029 | 153.7322 | 0.040449148 |
| SMIM11|60477|AP | -2.0482 | 5.91E-10 | 8.72E-19 | 0.4002046 | 0.040536878 |
| GAS6|26397|AP | -2.0482 | 0.0504274 | 0.0028922 | 0.8792268 | 0.040538756 |
| CDK10|38120|ES | 2.0466 | 4.0592778 | 1.0611284 | 15.528504 | 0.040693488 |
| GINS3|36636|ES | 2.0454 | 20.633264 | 1.1347131 | 375.18875 | 0.040819154 |
| PPOX|8568|AT | -2.0452 | 0.0544568 | 0.0033482 | 0.8857253 | 0.040831065 |
| FIGNL1|79694|AA | -2.0448 | 0.2892768 | 0.0881021 | 0.9498195 | 0.04087086 |
| NCKAP5|55400|ES | -2.0446 | 0.0923534 | 0.0094134 | 0.9060613 | 0.040890766 |
| DRG2|39549|RI | 2.0443 | 24.115997 | 1.1403581 | 509.99886 | 0.040921587 |
| ABCD4|28376|RI | -2.0443 | 0.0592215 | 0.003941 | 0.889917 | 0.040922193 |
| GUK1|10178|AP | 2.0438 | 66.183731 | 1.1877297 | 3687.9489 | 0.040969726 |
| XBP1|61562|AP | 2.041 | 31403.124 | 1.508513 | 653727337 | 0.041250784 |
| PARP9|66440|AP | 2.037 | 11.475817 | 1.096698 | 120.08263 | 0.041648487 |
| HTATIP2|14708|AT | 2.0336 | 43112.536 | 1.4717362 | 1.263E+09 | 0.041991371 |
| SKA2|42756|ES | 2.0328 | 7.9366279 | 1.0770634 | 58.483152 | 0.042071086 |
| CDYL|75229|AP | -2.0314 | 0.0597335 | 0.0039399 | 0.9056289 | 0.042211937 |
| LYNX1|85361|AP | -2.0311 | 0.3683882 | 0.1405436 | 0.9656069 | 0.042239829 |
| CTDNEP1|38878|AP | 2.0308 | 12.06304 | 1.0906975 | 133.4164 | 0.042278802 |
| ZNF706|84738|AT | -2.0261 | 0.0017493 | 3.77E-06 | 0.8127186 | 0.042749752 |
| FYN|77271|AP | -2.0248 | 0.0110764 | 0.0001417 | 0.8657136 | 0.042887294 |
| PIGK|3520|ES | -2.0234 | 2.50E-10 | 1.25E-19 | 0.4998673 | 0.043029818 |
| FXYD3|102077|ES | 2.0159 | 19.214081 | 1.0854997 | 340.10226 | 0.043808306 |
| CCNC|77075|AT | 2.0144 | 1130166.8 | 1.4569564 | 8.767E+11 | 0.043972225 |
| LETMD1|21760|ES | -2.0139 | 0.1579755 | 0.0262204 | 0.9517865 | 0.04402079 |
| CALCOCO2|42231|ES | -2.0138 | 0.114198 | 0.01382 | 0.9436466 | 0.044030887 |
| TRIQK|84493|ES | -2.0122 | 0.0852847 | 0.0077536 | 0.9380785 | 0.044197519 |
| KPTN|50650|ES | -2.0086 | 0.0004882 | 2.87E-07 | 0.8313147 | 0.044576137 |
| GGT1|61430|AP | 2.0067 | 3.1921077 | 1.0273979 | 9.9178241 | 0.044782172 |
| DNAJC19|67760|ES | 2.0041 | 157.24782 | 1.1178035 | 22120.951 | 0.04506031 |
| GLYCTK|65211|ES | 2.0033 | 4.4889392 | 1.0330045 | 19.506764 | 0.045146837 |
| MAP4|64551|AA | 2.0023 | 3873.6771 | 1.1909859 | 12599120 | 0.045249997 |
| RHBDL2|1863|AT | 1.9965 | 6.85E+34 | 4.3412762 | 1.08E+69 | 0.045878741 |
| UHRF1BP1|75792|AT | -1.9958 | 0.002214 | 5.47E-06 | 0.8960931 | 0.045957552 |
| DNAJC17|30045|AD | -1.9932 | 3.29E-05 | 1.29E-09 | 0.8418263 | 0.04623802 |
| TMPRSS4|18957|ES | 1.9899 | 13408374 | 1.2796819 | 1.405E+14 | 0.046605765 |
| TIPRL|8901|AT | 1.9895 | 552.79677 | 1.0983662 | 278217.1 | 0.04664351 |
| TMEM68|83869|AT | -1.9895 | 0.0002242 | 5.69E-08 | 0.8827786 | 0.046647882 |
| NOP16|117546|AA | -1.9893 | 0.0068815 | 5.10E-05 | 0.9291841 | 0.046666998 |
| ZNF782|86982|AP | 1.9892 | 19.916911 | 1.0449317 | 379.62608 | 0.046680372 |
| S100PBP|1638|AD | 1.9884 | 27.288469 | 1.0483983 | 710.28397 | 0.046768952 |
| ZNF551|52325|AT | -1.9877 | 0.0862344 | 0.0076951 | 0.9663843 | 0.046845133 |
| TMCO1|8806|AP | 1.9876 | 102.69066 | 1.0664577 | 9888.2224 | 0.046858731 |
| NPIPA7|34234|AT | 1.9859 | 14.29325 | 1.0353468 | 197.32228 | 0.047044478 |
| LYRM5|20809|AT | 1.9812 | 29.820093 | 1.037089 | 857.43645 | 0.047567156 |
| CUL2|11218|AP | 1.9801 | 76.295865 | 1.0450261 | 5570.2522 | 0.047694246 |
| MCTS1|90006|AP | 1.9753 | 16385743 | 1.1371988 | 2.361E+14 | 0.048239619 |
| NME4|32874|AP | -1.9728 | 0.038226 | 0.0014927 | 0.9789357 | 0.048514849 |
| SLC25A19|43428|AP | 1.9728 | 29.362068 | 1.0221767 | 843.42664 | 0.04852208 |
| PMM2|33931|ES | 1.9702 | 132775.59 | 1.0630635 | 1.658E+10 | 0.048818002 |
| TCN2|61788|AA | -1.9667 | 9.72E-05 | 9.76E-09 | 0.9687671 | 0.049215627 |

| **Table S2 Univariate Cox proportional hazards regression analysis of the 43 SFs** | | | | | |
| --- | --- | --- | --- | --- | --- |
| id | z | HR | HR.95L | HR.95H | pvalue |
| SNRPA | -2.84887 | 0.967 | 0.944995 | 0.9895966 | 0.004387449 |
| PQBP1 | -2.57088 | 0.9758 | 0.957767 | 0.9941986 | 0.010144091 |
| CCDC12 | -2.31396 | 0.9349 | 0.883103 | 0.9897563 | 0.020669864 |
| SNRPF | -2.26967 | 0.9688 | 0.942658 | 0.9956853 | 0.0232274 |
| CELF2 | -2.2419 | 0.7663 | 0.607248 | 0.9670842 | 0.024967783 |
| HSPA8 | 2.10524 | 1.0024 | 1.000166 | 1.0046607 | 0.035270015 |
| TXNL4A | -2.03944 | 0.9351 | 0.876712 | 0.9973886 | 0.04140576 |

| **TABLES3 The relationship between the SFs and AS-events** | | | | |
| --- | --- | --- | --- | --- |
| SF | AS | cor | pvalue | Regulation |
| SRRM2 | GUK1-10178-AP | -0.531754557 | 5.71E-18 | negative |
| LUC7L3 | LEMD2-75766-AP | -0.503560808 | 5.36E-16 | negative |
| LUC7L3 | TRADD-36927-AP | 0.511456426 | 1.57E-16 | postive |
| LUC7L3 | EGLN2-50008-AP | -0.510905755 | 1.71E-16 | negative |
| HSPA8 | GEMIN4-38259-AP | -0.524007047 | 2.08E-17 | negative |
| DHX8 | CALCOCO2-42231-ES | -0.52206482 | 2.85E-17 | negative |
| DHX8 | LYRM5-20809-AT | 0.504245564 | 4.82E-16 | postive |
| PNN | EGLN2-50008-AP | -0.510342571 | 1.87E-16 | negative |
| PRPF40A | LYRM5-20809-AT | 0.506440497 | 3.43E-16 | postive |
| SNRPB | KIAA1328-45287-AT | 0.526836307 | 1.30E-17 | postive |
| CELF2 | TC2N-28884-AP | -0.509434744 | 2.15E-16 | negative |
| SDE2 | PPOX-8568-AT | -0.535578864 | 2.99E-18 | negative |
| LUC7L | TIPRL-8901-AT | -0.553209111 | 1.34E-19 | negative |
| PCBP1 | MTIF2-53607-ES | -0.53530071 | 3.13E-18 | negative |
| PCBP1 | COX15-12777-AT | -0.517766944 | 5.73E-17 | negative |
| PCBP1 | PPP1CC-24497-AP | 0.540754379 | 1.22E-18 | postive |
| PCBP1 | NPIPA7-34234-AT | 0.517872447 | 5.63E-17 | postive |
| LSM4 | ARHGEF39-86272-AT | 0.503948817 | 5.05E-16 | postive |
| DHX38 | CDK10-38109-AP | -0.557903433 | 5.70E-20 | negative |
| DHX38 | NPIPA7-34234-AT | 0.517756246 | 5.74E-17 | postive |
| DHX15 | SLC35A2-89035-AT | -0.547814852 | 3.54E-19 | negative |
| GPATCH8 | MTIF2-53607-ES | -0.500895231 | 8.06E-16 | negative |
| GPATCH8 | YLPM1-28426-AT | -0.516864169 | 6.62E-17 | negative |
| GPATCH8 | COX15-12777-AT | -0.535462099 | 3.05E-18 | negative |
| GPATCH8 | DNM1-87721-AT | -0.510160383 | 1.92E-16 | negative |
| GPATCH8 | PABPC1L-59491-AP | -0.554040116 | 1.16E-19 | negative |
| GPATCH8 | CALCOCO2-42231-ES | -0.505392611 | 4.04E-16 | negative |
| GPATCH8 | NPIPA7-34234-AT | 0.640729551 | 1.24E-27 | postive |
| GPATCH8 | LYRM5-20809-AT | 0.64952186 | 1.37E-28 | postive |
| SREK1 | LTBR-19846-AP | 0.561465567 | 2.95E-20 | postive |
| TFIP11 | PPP1CC-24497-AP | 0.524109028 | 2.04E-17 | postive |
| DDX46 | LYRM5-20809-AT | 0.541773224 | 1.03E-18 | postive |
| RBFOX2 | DLD-81376-AT | -0.554361767 | 1.09E-19 | negative |
| RBFOX2 | DLD-81377-AT | 0.554358143 | 1.09E-19 | postive |
| RBFOX2 | PLEKHB2-55368-AP | 0.509223093 | 2.23E-16 | postive |
| RBFOX2 | LYRM5-20809-AT | 0.502824262 | 6.00E-16 | postive |
| SNRNP35 | WTAP-78310-AP | 0.62154962 | 1.18E-25 | postive |
| SNRNP35 | LTBP3-16862-AP | -0.595285932 | 3.72E-23 | negative |
| SNRNP35 | CAMKK2-24848-AP | -0.531142134 | 6.34E-18 | negative |
| SNRNP35 | CAMKK2-24845-AP | 0.538062414 | 1.95E-18 | postive |
| SNRNP35 | PDK1-55972-AP | 0.554095676 | 1.14E-19 | postive |
| SNRNP35 | FAM76A-1344-ES | 0.643699104 | 5.94E-28 | postive |
| SNRNP35 | CHEK1-19309-AP | -0.549554464 | 2.59E-19 | negative |
| SNRNP35 | CDK10-38109-AP | 0.52979577 | 7.94E-18 | postive |
| SNRNP35 | MTIF2-53607-ES | 0.663848354 | 3.25E-30 | postive |
| SNRNP35 | ZNF638-53927-AP | -0.517407319 | 6.07E-17 | negative |
| SNRNP35 | USP48-995-AP | -0.550878316 | 2.05E-19 | negative |
| SNRNP35 | FUT8-28010-AP | -0.665482317 | 2.09E-30 | negative |
| SNRNP35 | NGLY1-63751-AP | 0.685132495 | 8.38E-33 | postive |
| SNRNP35 | PLEKHB2-55368-AP | -0.698303371 | 1.61E-34 | negative |
| SNRNP35 | UBXN2A-52795-AP | 0.559954751 | 3.91E-20 | postive |
| SNRNP35 | TUBGCP2-13529-AP | -0.611687783 | 1.09E-24 | negative |
| SNRNP35 | COX15-12777-AT | 0.658639958 | 1.30E-29 | postive |
| SNRNP35 | EMP1-20539-ES | -0.539571978 | 1.50E-18 | negative |
| SNRNP35 | DAG1-64873-AP | -0.62042994 | 1.53E-25 | negative |
| SNRNP35 | ANKRD13D-17156-AP | 0.531544518 | 5.92E-18 | postive |
| SNRNP35 | LGMN-29011-ES | 0.596025305 | 3.19E-23 | postive |
| SNRNP35 | DNM1-87721-AT | 0.548652155 | 3.05E-19 | postive |
| SNRNP35 | PLS3-89927-ES | 0.684740041 | 9.39E-33 | postive |
| SNRNP35 | PABPC1L-59491-AP | 0.586054099 | 2.49E-22 | postive |
| SNRNP35 | SLC38A1-21321-AP | 0.587596263 | 1.82E-22 | postive |
| SNRNP35 | PPP1CC-24497-AP | -0.684370926 | 1.05E-32 | negative |
| SNRNP35 | PPOX-8568-AT | 0.545188812 | 5.63E-19 | postive |
| SNRNP35 | CALCOCO2-42231-ES | 0.656868923 | 2.06E-29 | postive |
| SNRNP35 | NPIPA7-34234-AT | -0.612569877 | 8.97E-25 | negative |
| SNRNP35 | LYRM5-20809-AT | -0.647219229 | 2.46E-28 | negative |
| RNF40 | LTBP3-16862-AP | 0.506521386 | 3.39E-16 | postive |
| RNF40 | SLC6A9-2538-AT | 0.506726054 | 3.28E-16 | postive |
| RNF40 | CAMKK2-24848-AP | 0.503584149 | 5.34E-16 | postive |
| RNF40 | CAMKK2-24845-AP | -0.517832583 | 5.67E-17 | negative |
| RNF40 | PDK1-55972-AP | -0.500578419 | 8.45E-16 | negative |
| RNF40 | FAM76A-1344-ES | -0.561498976 | 2.93E-20 | negative |
| RNF40 | CDK10-38109-AP | -0.529479836 | 8.37E-18 | negative |
| RNF40 | MTIF2-53607-ES | -0.578409389 | 1.15E-21 | negative |
| RNF40 | FUT8-28010-AP | 0.57009201 | 5.78E-21 | postive |
| RNF40 | PLEKHB2-55368-AP | 0.56794498 | 8.71E-21 | postive |
| RNF40 | TUBGCP2-13529-AP | 0.562052505 | 2.64E-20 | postive |
| RNF40 | COX15-12777-AT | -0.531776602 | 5.69E-18 | negative |
| RNF40 | EMP1-20539-ES | 0.519752675 | 4.16E-17 | postive |
| RNF40 | PABPC1L-59491-AP | -0.521328724 | 3.22E-17 | negative |
| RNF40 | SLC25A10-44158-AP | 0.535207744 | 3.18E-18 | postive |
| RNF40 | PPP1CC-24497-AP | 0.601717633 | 9.55E-24 | postive |
| RNF40 | CALCOCO2-42231-ES | -0.525403059 | 1.65E-17 | negative |
| RNF40 | NPIPA7-34234-AT | 0.626019391 | 4.20E-26 | postive |
| RNF40 | LYRM5-20809-AT | 0.547961906 | 3.45E-19 | postive |
| ZFR | MTIF2-53607-ES | -0.506258855 | 3.53E-16 | negative |
| ZFR | COX15-12777-AT | -0.514226102 | 1.01E-16 | negative |
| ZFR | NPIPA7-34234-AT | 0.514386519 | 9.85E-17 | postive |
| ZFR | LYRM5-20809-AT | 0.532539934 | 5.00E-18 | postive |
| ZC3H18 | CDK10-38109-AP | -0.509022767 | 2.30E-16 | negative |
| TNPO1 | MTIF2-53607-ES | -0.549752419 | 2.50E-19 | negative |
| TNPO1 | COX15-12777-AT | -0.500980798 | 7.95E-16 | negative |
| EIF3A | WTAP-78310-AP | -0.512334637 | 1.36E-16 | negative |
| EIF3A | CAMKK2-24848-AP | 0.561687054 | 2.83E-20 | postive |
| EIF3A | CAMKK2-24845-AP | -0.583674221 | 4.02E-22 | negative |
| EIF3A | PDK1-55972-AP | -0.558747708 | 4.88E-20 | negative |
| EIF3A | FAM76A-1344-ES | -0.557944593 | 5.66E-20 | negative |
| EIF3A | CHEK1-19309-AP | 0.539334993 | 1.57E-18 | postive |
| EIF3A | MTIF2-53607-ES | -0.691749883 | 1.18E-33 | negative |
| EIF3A | CHCHD3-81833-AT | -0.53565651 | 2.95E-18 | negative |
| EIF3A | USP48-995-AP | 0.544763754 | 6.07E-19 | postive |
| EIF3A | FUT8-28010-AP | 0.558289208 | 5.31E-20 | postive |
| EIF3A | NGLY1-63751-AP | -0.573007828 | 3.29E-21 | negative |
| EIF3A | PLEKHB2-55368-AP | 0.659877462 | 9.35E-30 | postive |
| EIF3A | TUBGCP2-13529-AP | 0.580457394 | 7.64E-22 | postive |
| EIF3A | COX15-12777-AT | -0.663907268 | 3.20E-30 | negative |
| EIF3A | DAG1-64873-AP | 0.564797939 | 1.58E-20 | postive |
| EIF3A | DNM1-87721-AT | -0.510111656 | 1.94E-16 | negative |
| EIF3A | PLS3-89927-ES | -0.586922189 | 2.09E-22 | negative |
| EIF3A | PABPC1L-59491-AP | -0.554901943 | 9.88E-20 | negative |
| EIF3A | PPP1CC-24497-AP | 0.598211781 | 2.01E-23 | postive |
| EIF3A | PPOX-8568-AT | -0.524747371 | 1.84E-17 | negative |
| EIF3A | CALCOCO2-42231-ES | -0.565133429 | 1.48E-20 | negative |
| EIF3A | NPIPA7-34234-AT | 0.624655408 | 5.77E-26 | postive |
| EIF3A | LYRM5-20809-AT | 0.67587065 | 1.19E-31 | postive |
| DDX21 | CHEK1-19309-AP | 0.533926717 | 3.96E-18 | postive |
| DDX21 | MTIF2-53607-ES | -0.58596979 | 2.53E-22 | negative |
| DDX21 | PLEKHB2-55368-AP | 0.574442786 | 2.49E-21 | postive |
| DDX21 | COX15-12777-AT | -0.577566804 | 1.35E-21 | negative |
| DDX21 | LYRM5-20809-AT | 0.540984449 | 1.18E-18 | postive |
| CDK12 | MTIF2-53607-ES | -0.559106279 | 4.57E-20 | negative |
| CDK12 | FUT8-28010-AP | 0.521460321 | 3.15E-17 | postive |
| CDK12 | PLEKHB2-55368-AP | 0.538542936 | 1.80E-18 | postive |
| CDK12 | TUBGCP2-13529-AP | 0.509562031 | 2.11E-16 | postive |
| CDK12 | COX15-12777-AT | -0.583399189 | 4.25E-22 | negative |
| CDK12 | DAG1-64873-AP | 0.560648448 | 3.43E-20 | postive |
| CDK12 | PPOX-8568-AT | -0.507064694 | 3.12E-16 | negative |
| CDK12 | CALCOCO2-42231-ES | -0.54243494 | 9.14E-19 | negative |
| CDK12 | NPIPA7-34234-AT | 0.571292781 | 4.59E-21 | postive |
| CDK12 | LYRM5-20809-AT | 0.655656587 | 2.83E-29 | postive |
| DDX3X | LYRM5-20809-AT | 0.503596139 | 5.33E-16 | postive |
| MBNL2 | AMMECR1-89875-AP | -0.542907311 | 8.41E-19 | negative |
| DDX18 | MTIF2-53607-ES | -0.571370764 | 4.52E-21 | negative |
| DDX18 | PLEKHB2-55368-AP | 0.552386602 | 1.56E-19 | postive |
| DDX18 | COX15-12777-AT | -0.503028318 | 5.81E-16 | negative |
| FUBP3 | MTIF2-53607-ES | -0.528100488 | 1.05E-17 | negative |
| FUBP3 | COX15-12777-AT | -0.520583131 | 3.63E-17 | negative |
| FUBP3 | CALCOCO2-42231-ES | -0.51009634 | 1.94E-16 | negative |
| FUBP3 | NPIPA7-34234-AT | 0.535401507 | 3.08E-18 | postive |
| FUBP3 | LYRM5-20809-AT | 0.516215095 | 7.35E-17 | postive |
| RAVER1 | CAMKK2-24845-AP | -0.50436837 | 4.73E-16 | negative |
| RAVER1 | FUT8-28010-AP | 0.567999071 | 8.62E-21 | postive |
| RAVER1 | TM9SF1-26891-AP | -0.541069534 | 1.16E-18 | negative |
| RAVER1 | TUBGCP2-13529-AP | 0.533615847 | 4.17E-18 | postive |
| RAVER1 | DAG1-64873-AP | 0.517863854 | 5.64E-17 | postive |
| RAVER1 | PABPC1L-59491-AP | -0.513572956 | 1.12E-16 | negative |
| RAVER1 | NPIPA7-34234-AT | 0.625050504 | 5.26E-26 | postive |
| SPEN | NPIPA7-34234-AT | 0.548741337 | 3.00E-19 | postive |
| SPEN | LYRM5-20809-AT | 0.593450081 | 5.46E-23 | postive |
| SNRPF | PDK1-55972-AP | 0.506814121 | 3.24E-16 | postive |
| SNRPF | NPIPA7-34234-AT | -0.523485308 | 2.26E-17 | negative |
| SNRPF | LYRM5-20809-AT | -0.513328854 | 1.16E-16 | negative |
| TXNL4A | GALNT4-23640-AP | -0.519363802 | 4.43E-17 | negative |
| PRPF38B | YJEFN3-48656-AT | -0.504231825 | 4.83E-16 | negative |
| SNRPA | FAM76A-1344-ES | 0.519655412 | 4.22E-17 | postive |
| SNRPA | GALNT4-23640-AP | -0.527914582 | 1.09E-17 | negative |
| SNRPA | NGLY1-63751-AP | 0.555712452 | 8.52E-20 | postive |
| SNRPA | PLEKHB2-55368-AP | -0.542189601 | 9.54E-19 | negative |
| SNRPA | COX15-12777-AT | 0.550464765 | 2.20E-19 | postive |
| SNRPA | PLS3-89927-ES | 0.578954395 | 1.03E-21 | postive |
| SNRPA | PPP1CC-24497-AP | -0.538318083 | 1.87E-18 | negative |
| SNRPA | PPOX-8568-AT | 0.508585797 | 2.46E-16 | postive |
| SNRPA | CALCOCO2-42231-ES | 0.590494697 | 1.01E-22 | postive |
| SNRPA | NPIPA7-34234-AT | -0.508154992 | 2.63E-16 | negative |
| SNRPA | LYRM5-20809-AT | -0.534743393 | 3.44E-18 | negative |
| CCDC12 | FUT8-28010-AP | -0.5565442 | 7.32E-20 | negative |
| CCDC12 | PLS3-89927-ES | 0.561122729 | 3.14E-20 | postive |
| CCDC12 | PPP1CC-24497-AP | -0.517716088 | 5.78E-17 | negative |
| CCDC12 | NPIPA7-34234-AT | -0.51956397 | 4.29E-17 | negative |
| PQBP1 | WTAP-78310-AP | 0.505917119 | 3.72E-16 | postive |
| PQBP1 | MTIF2-53607-ES | 0.516879567 | 6.61E-17 | postive |
| PQBP1 | GALNT4-23640-AP | -0.515028488 | 8.89E-17 | negative |
| PQBP1 | PLEKHB2-55368-AP | -0.500196654 | 8.96E-16 | negative |
| PQBP1 | COX15-12777-AT | 0.570746655 | 5.10E-21 | postive |
| PQBP1 | PLS3-89927-ES | 0.539549002 | 1.51E-18 | postive |
| PQBP1 | ARHGEF39-86272-AT | 0.510370353 | 1.86E-16 | postive |
| PQBP1 | PPP1CC-24497-AP | -0.539284833 | 1.58E-18 | negative |
| PQBP1 | CALCOCO2-42231-ES | 0.50360794 | 5.32E-16 | postive |
| PQBP1 | NPIPA7-34234-AT | -0.518194582 | 5.35E-17 | negative |
| PQBP1 | LYRM5-20809-AT | -0.555109882 | 9.51E-20 | negative |
| HSPB1 | DLD-81376-AT | 0.512257368 | 1.38E-16 | postive |
| HSPB1 | DLD-81377-AT | -0.512248153 | 1.38E-16 | negative |
| SNRPD1 | KIAA1328-45287-AT | 0.539367212 | 1.56E-18 | postive |
| SNRPD1 | NPIPA7-34234-AT | -0.502880915 | 5.95E-16 | negative |
| DHX9 | MTIF2-53607-ES | -0.53353728 | 4.23E-18 | negative |
| DHX9 | PLEKHB2-55368-AP | 0.500388187 | 8.70E-16 | postive |
| DHX9 | TUBGCP2-13529-AP | 0.511232344 | 1.62E-16 | postive |
| DHX9 | COX15-12777-AT | -0.500157386 | 9.01E-16 | negative |
| DHX9 | EMP1-20539-ES | 0.516644357 | 6.86E-17 | postive |
| DHX9 | PPP1CC-24497-AP | 0.532622493 | 4.94E-18 | postive |
| DDX39B | GUK1-10178-AP | -0.500487879 | 8.57E-16 | negative |
